# Supplementary material for: Structural basis for allosteric regulation of mycobacterial guanosine 5´-monophosphate reductase by ATP and GTP
Source: Research Square preprint supplement (doi:10.21203/rs.3.rs-6836519/v1), 2025-06-18
Supplement: Supplementary file 1 [file c024802f04ef20bbfa0509ed.docx]

**Supplementary Information**

**Structural basis for allosteric regulation of mycobacterial guanosine 5´-monophosphate reductase by ATP and GTP**

Michal Doležal1, Zdeněk Knejzlík1, Tomáš Kouba1, Anatolij Filimoněnko1, Hana Šváchová1, Martin Klíma1 & Iva Pichová1*

1Institute of Organic Chemistry and Biochemistry of the Czech Academy of Sciences, Flemingovo náměstí 2, 166 10 Prague, Czech Republic

*Correspondence and requests for materials should be addressed to Iva Pichová, iva.pichova@uochb.cas.cz.

**Supplementary Figures**


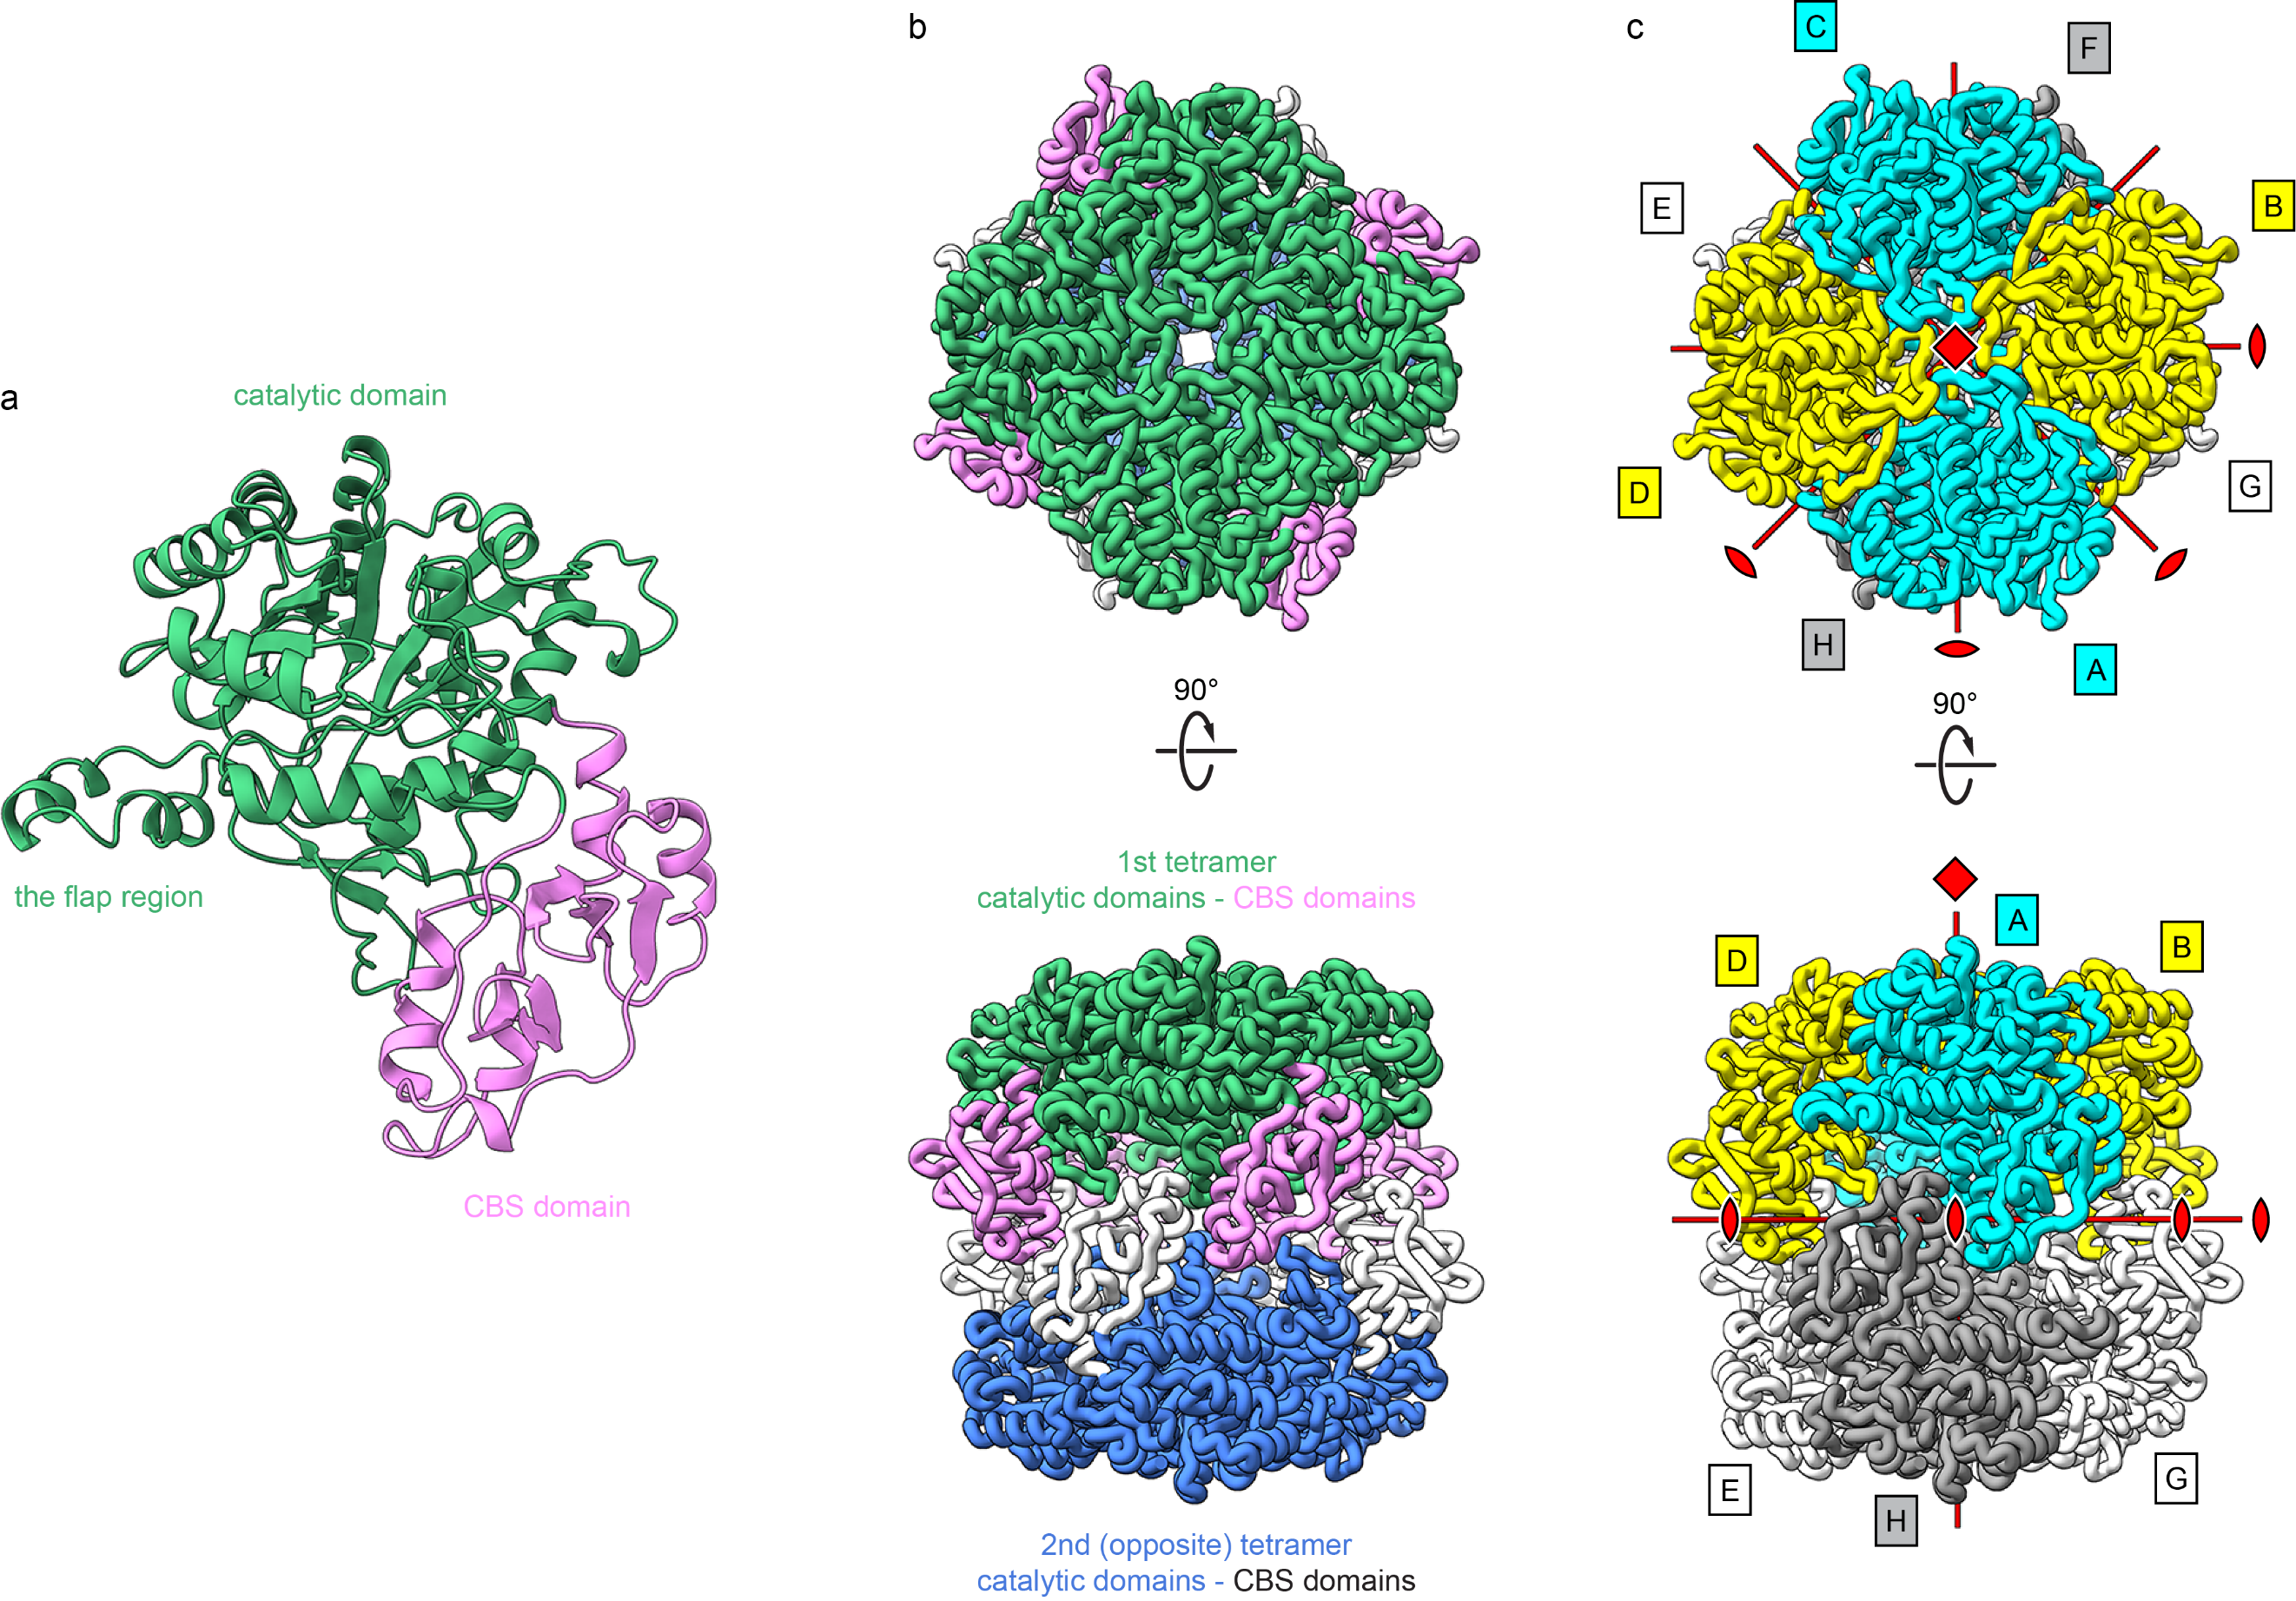


Supplementary Fig. 1 | Structure of *Msm*GMPR.

a The *Msm*GMPR monomer consists of a catalytic domain (green) and a CBS domain (magenta). b, c Structure of the *Msm*GMPR octamer (PDB ID: 9HG0). *Msm*GMPR forms tetramers with C4 symmetry, which further assemble into octamers with D4 symmetry. b Catalytic domains are shown in green and blue; CBS domains are shown in magenta and white. c The first tetramer is shown in cyan and yellow, and the second (opposite) tetramer is shown in grey and white. Chain identifiers are shown in squares. The four-fold axis and two-fold axes are shown as red lines and marked with a square or an ellipse, respectively.


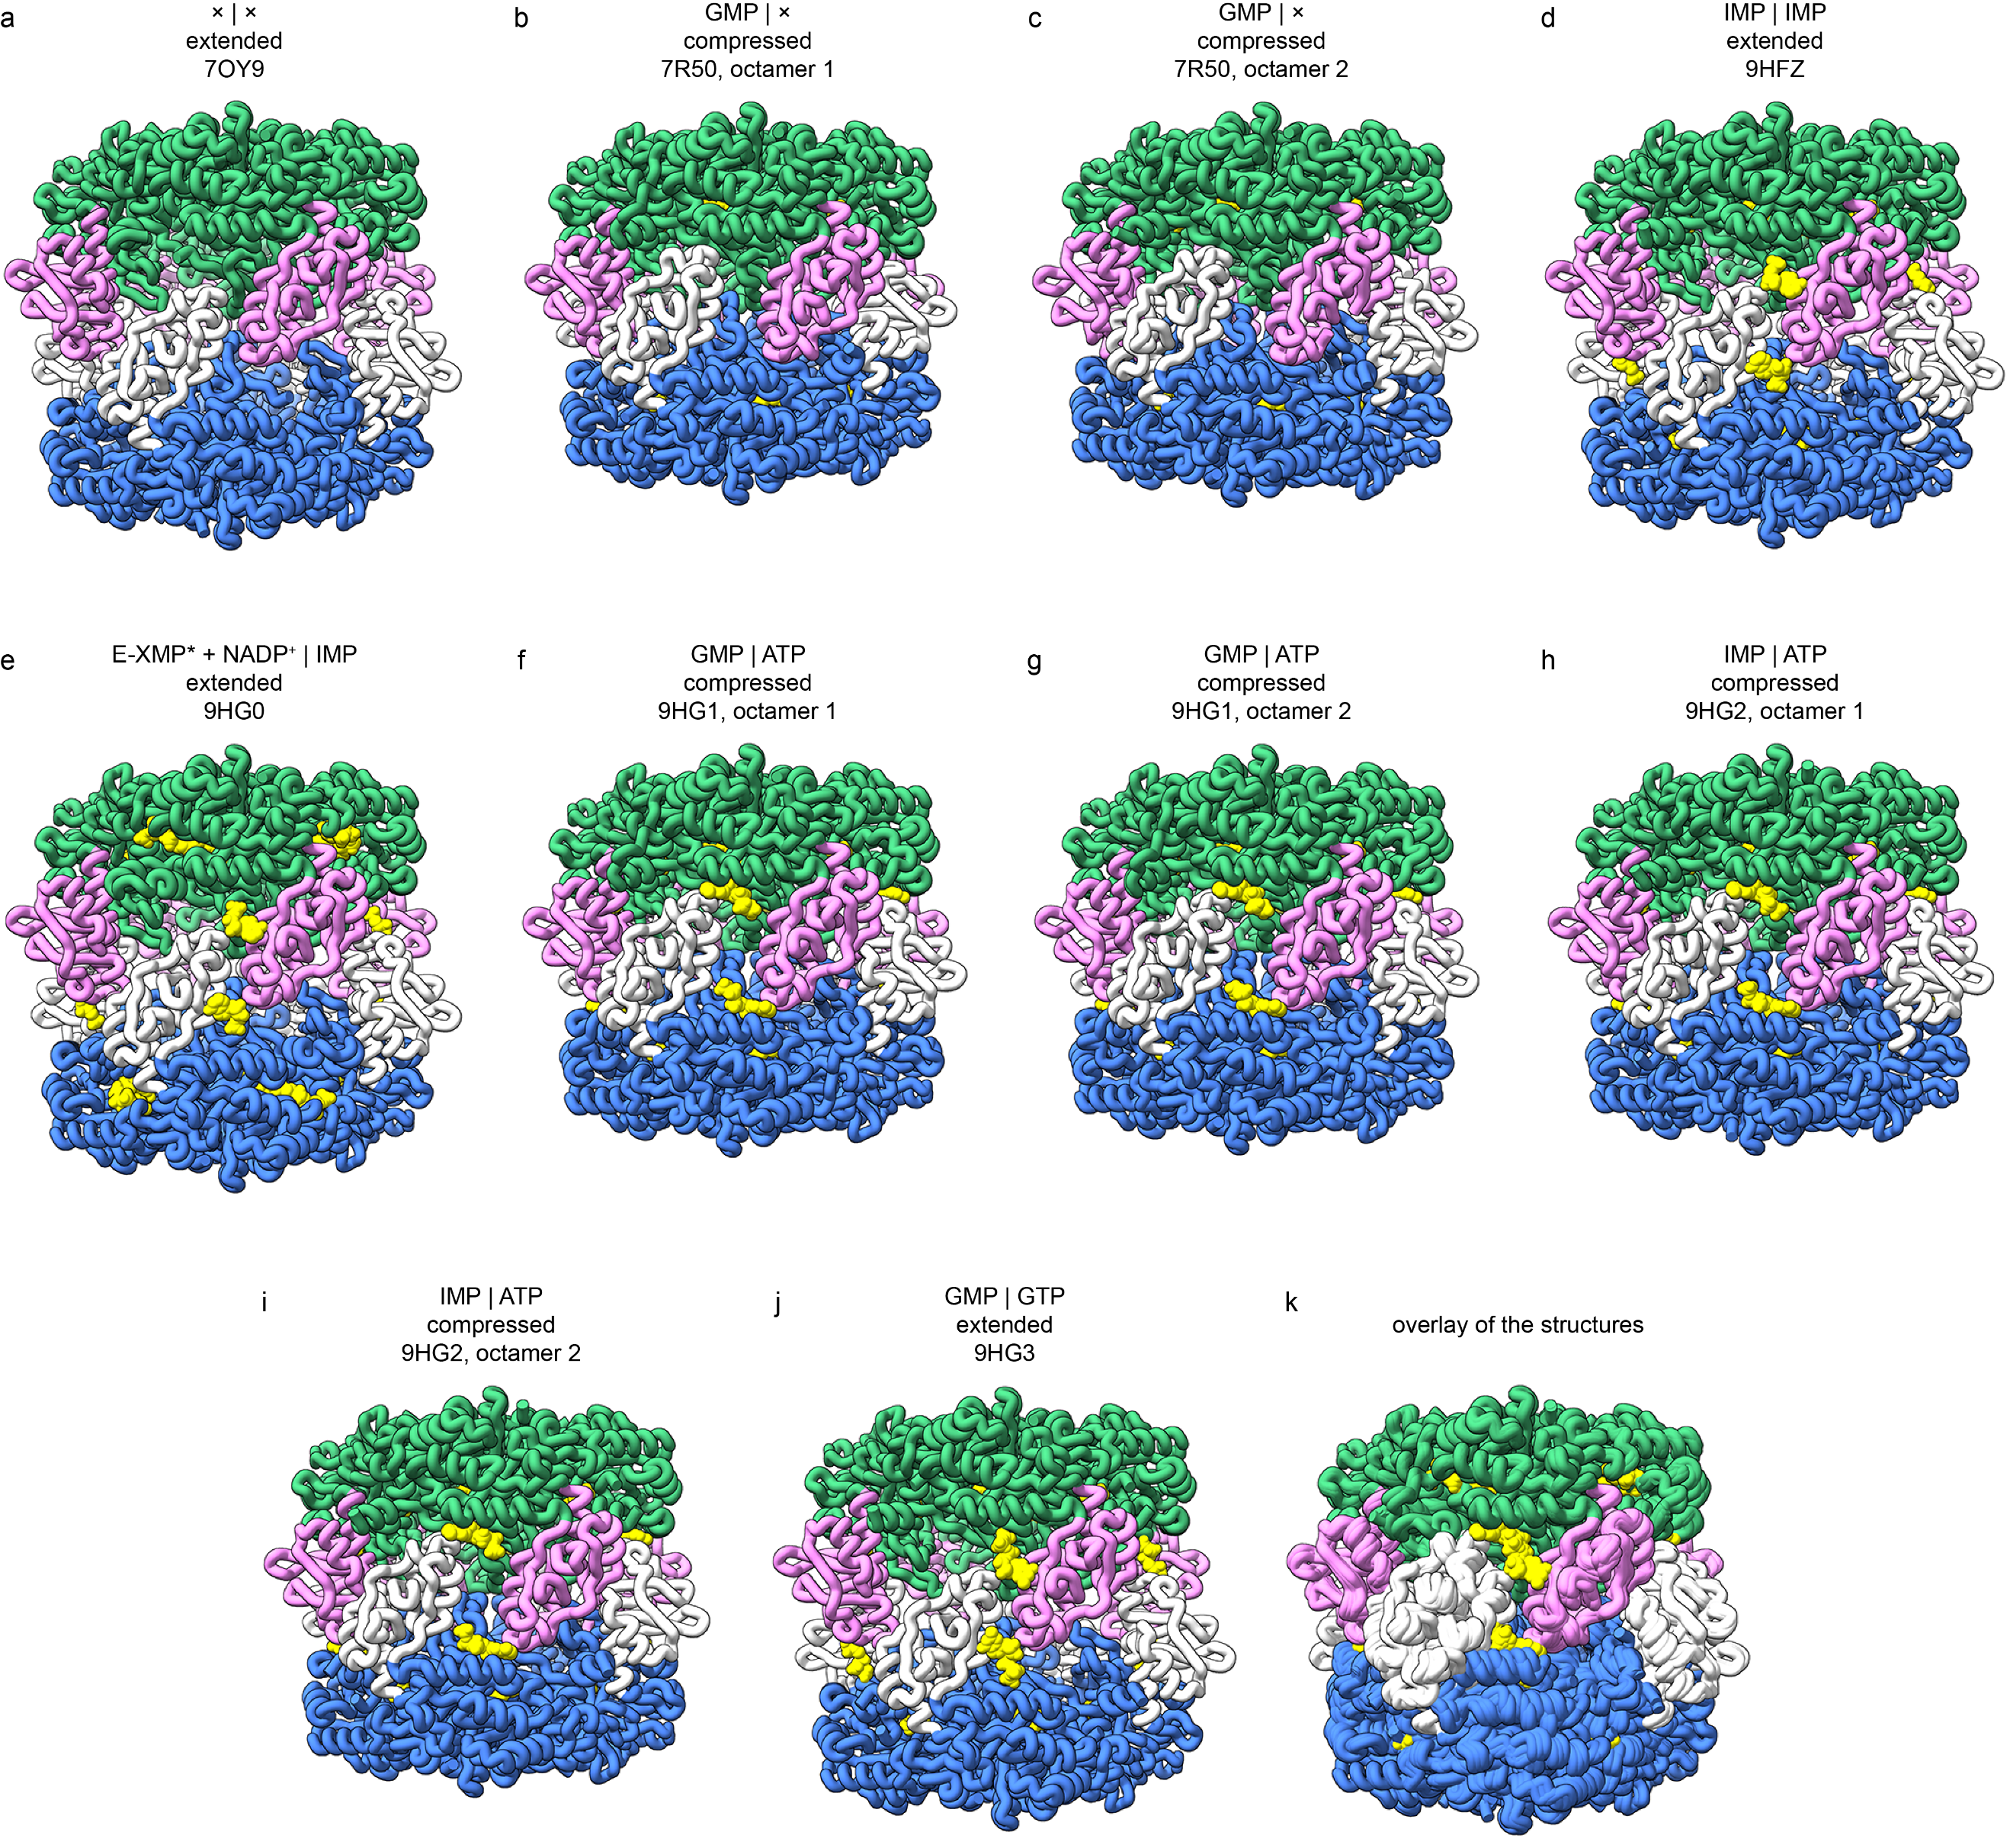


Supplementary Fig. 2 | Structures of *Msm*GMPR determined by X-ray crystallography.

The first line of text (left of the bar) shows ligands bound in the active site; the right side of the bar shows ligands bound in ligand-binding site A or G. The second line of text describes the conformation of the octamer. The third line of text provides the PDB ID of the structure and, where applicable, identifies which octamer was used when the asymmetric unit contains two octamers. Catalytic domains are shown in green and blue; CBS domains are shown in magenta and white. Ligands are represented as yellow spheres. Structures were aligned over the catalytic domains of the first tetramer (green).


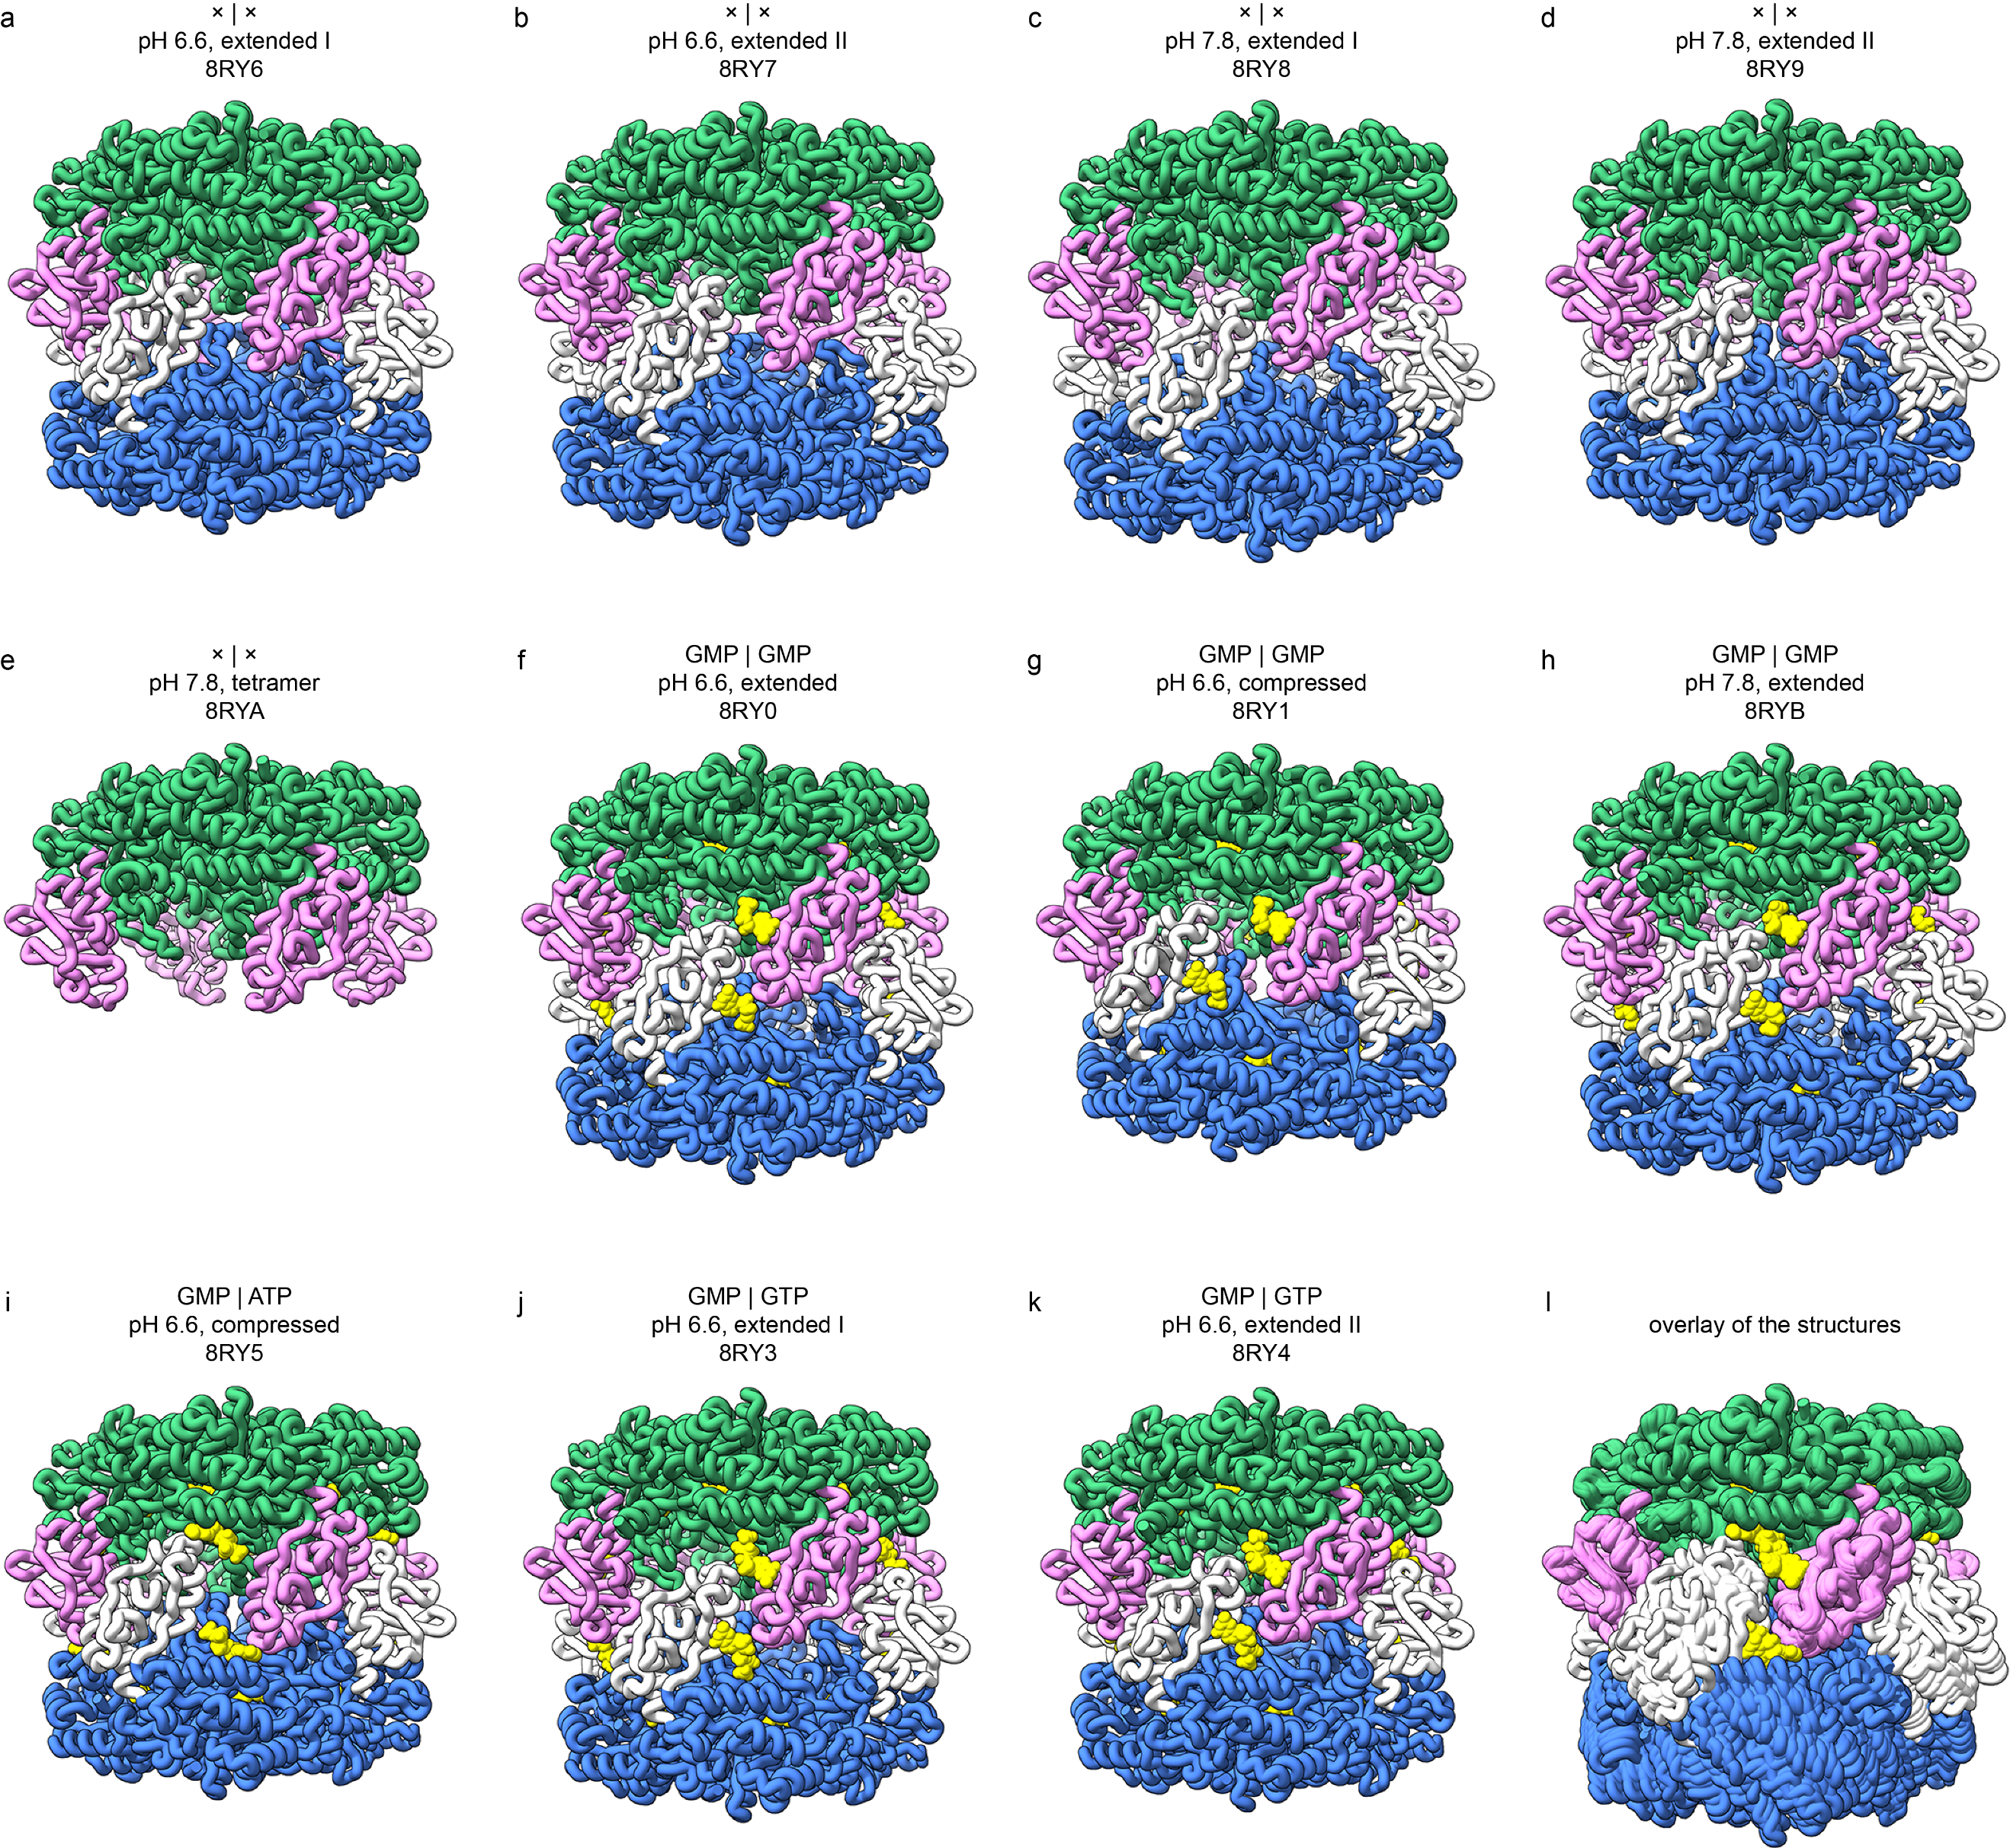


Supplementary Fig. 3 | Structures of *Msm*GMPR determined by cryo-EM.

The first line of text (left of the bar) shows ligands bound in the active site; the right side of the bar shows ligands bound in ligand-binding site A or G. The second line of text shows the pH at which the structure was determined and the conformation of the octamer. The third line of text provides the PDB ID of the structure. Catalytic domains are shown in green and blue; CBS domains are shown in magenta and white. Ligands are represented as yellow spheres. Structures were aligned over the catalytic domains of the first tetramer (green).


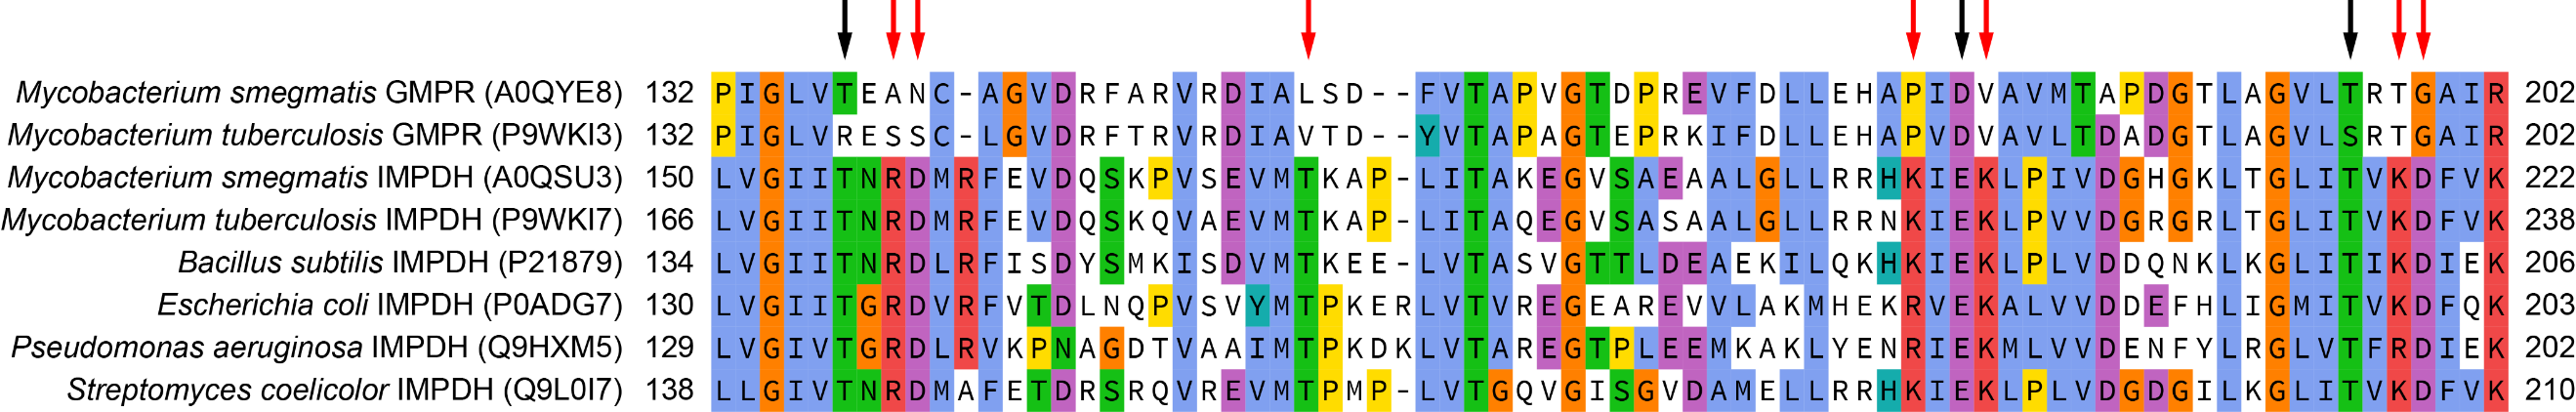


Supplementary Fig. 4 | Conservation of canonical nucleotide-binding sites in *Msm*GMPR.

A partial multiple sequence alignment of selected bacterial IMPDHs and *Msm*GMPR. UniProt accession numbers for each sequence are provided in parentheses. Residues whose side chains typically form hydrogen bonds with nucleotides bound in canonical binding sites 1 and 2 are indicated with arrows. Only 3 (black arrows) of the 10 residues are conserved in *Msm*GMPR.


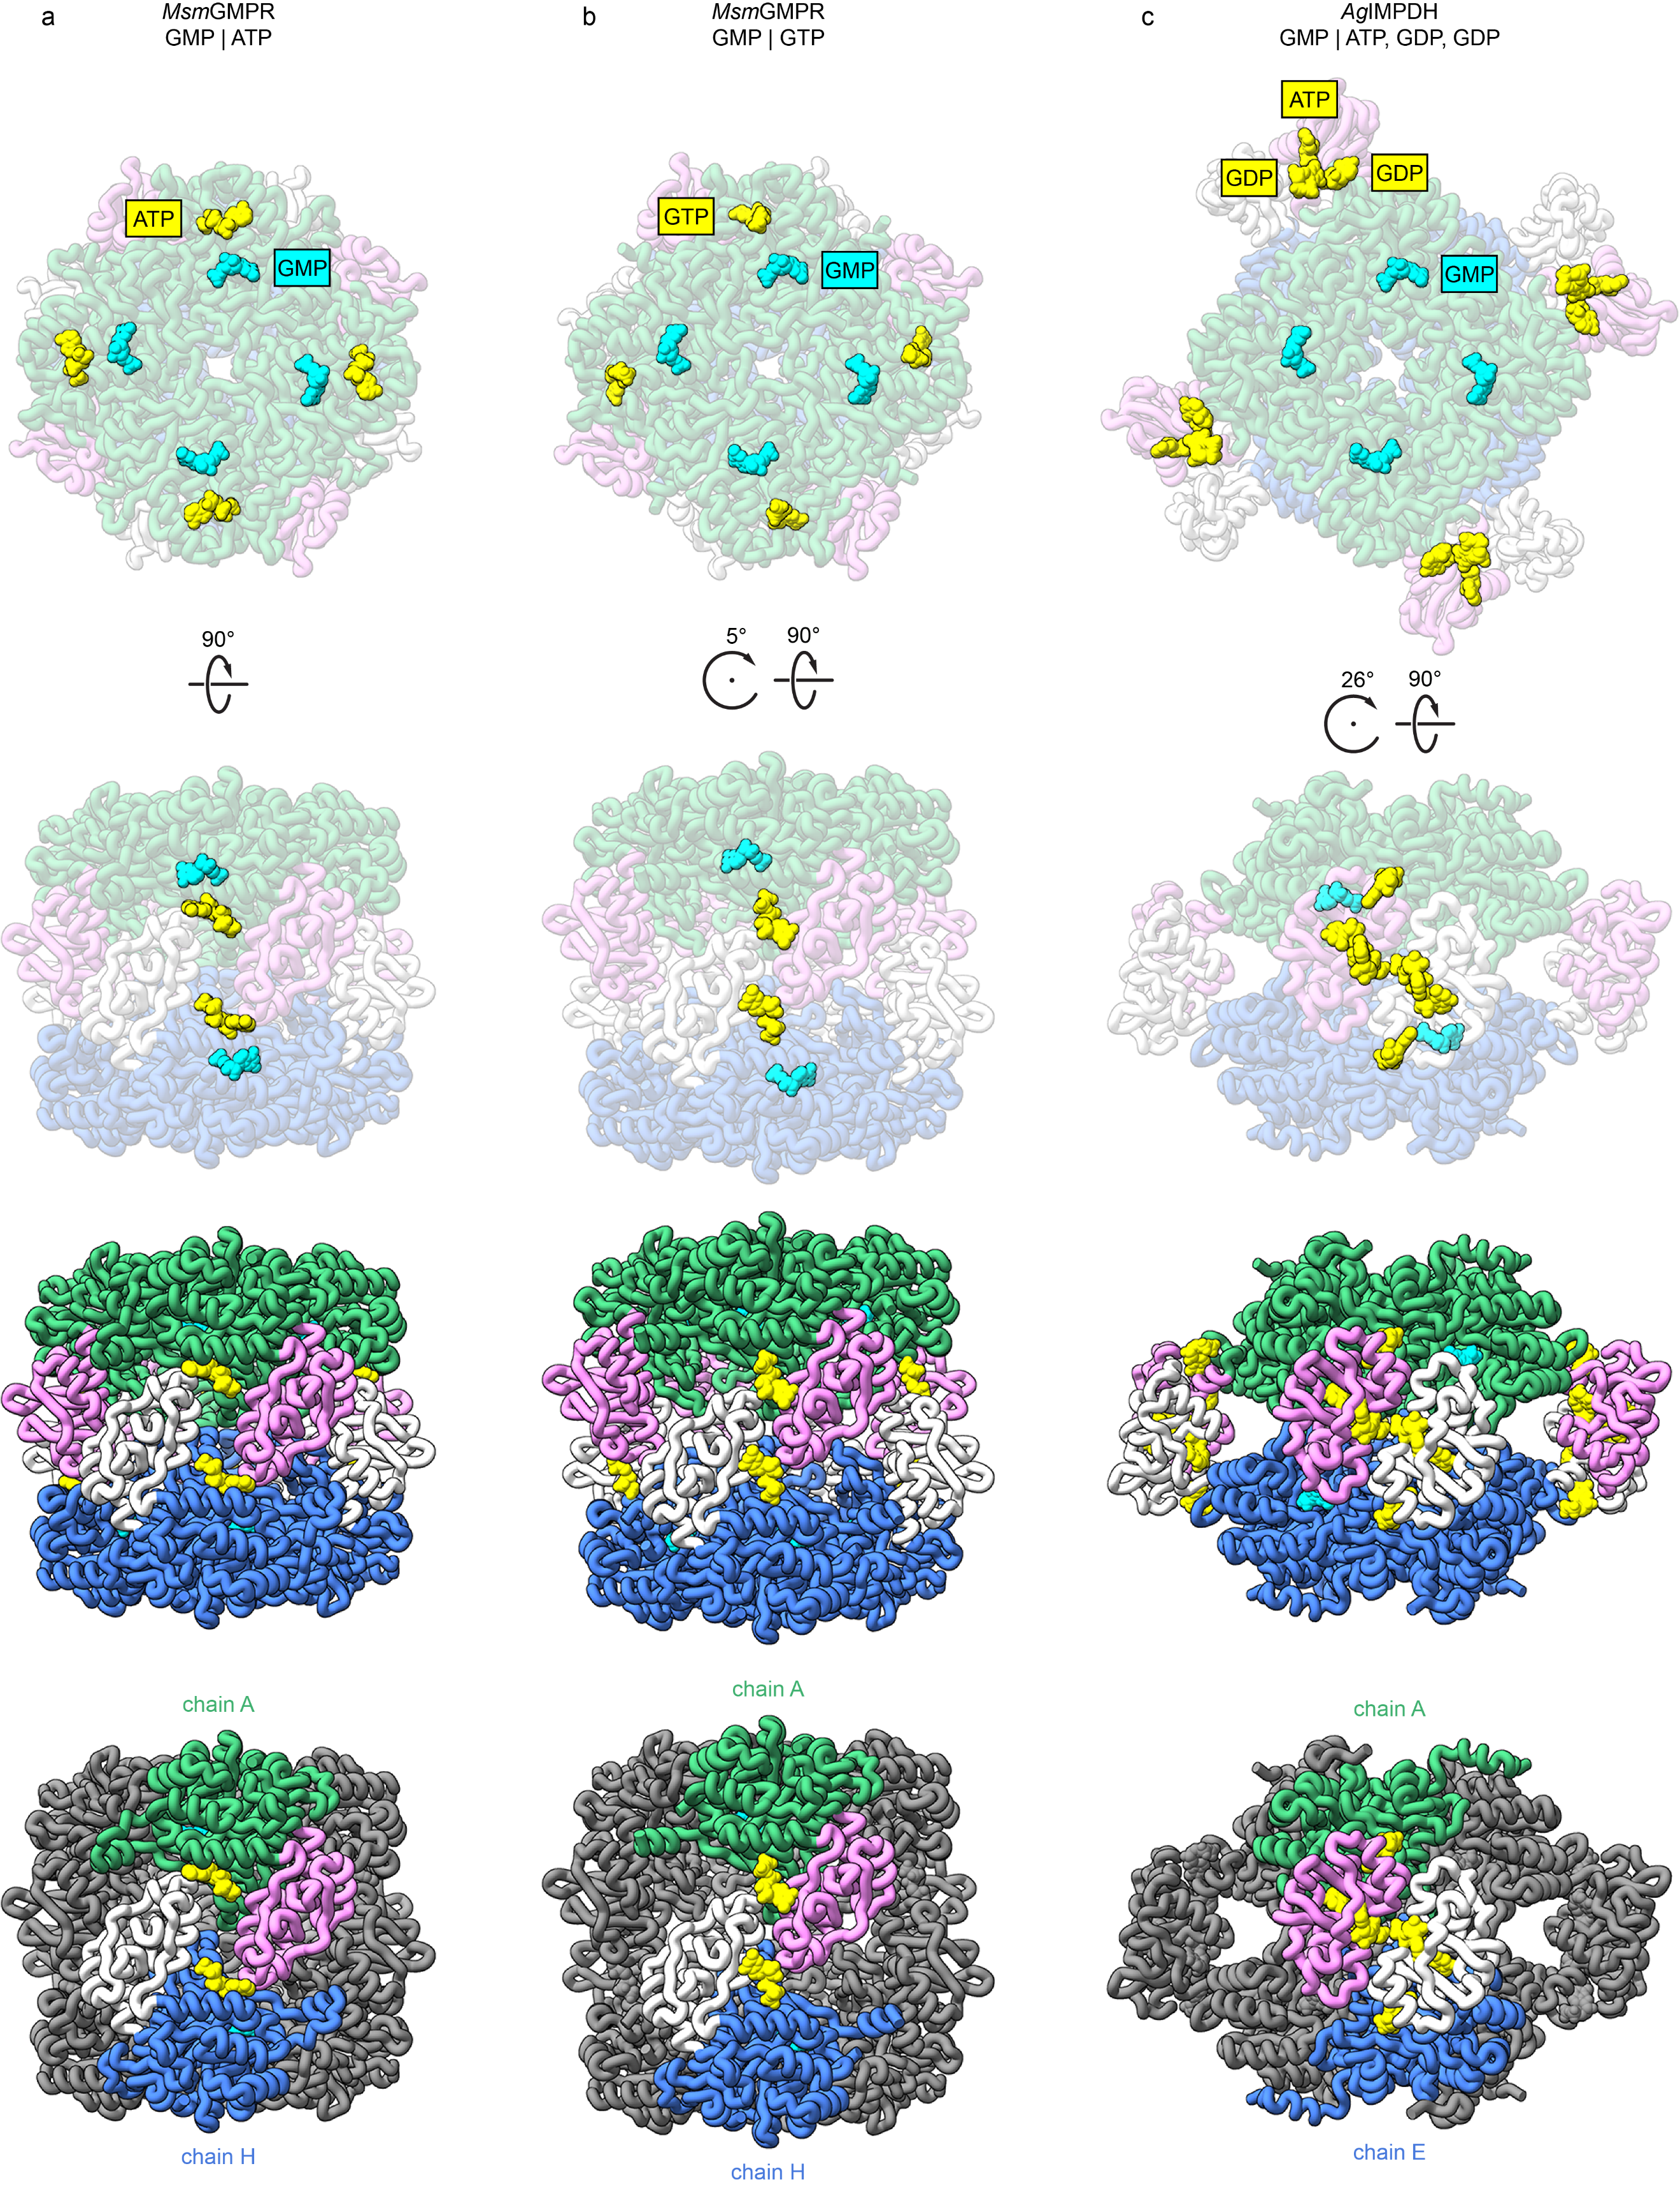


Supplementary Fig. 5 | Positions of ATP and GTP bound in *Msm*GMPR.

a Structure of *Msm*GMPR with ATP bound in nucleotide-binding site A (PDB ID: 9HG2). b Structure of *Msm*GMPR with GTP bound in nucleotide-binding site G (PDB ID: 9HG3). c Structure of *Ashbya gossypii* IMPDH with ATP and GDP in the canonical nucleotide-binding sites and GDP in a non-canonical site1,2 (PDB ID: 5TC3). All structures also contain GMP bound in the active site. GMP in the active site is shown in cyan; other nucleotides are shown in yellow. Catalytic domains are shown in green and blue; CBS domains are shown in magenta and white. First row: Top view of structures superimposed over the catalytic domains of the upper tetramer; only ligands from the upper tetramer are shown. Second row: Only the ligands from the two chains proximal to the viewer are shown. Third and fourth rows: All ligands are shown. In the fourth row, only the two proximal chains and their ligands are coloured. Side views have been rotated to centre the two proximal chains towards the viewer.


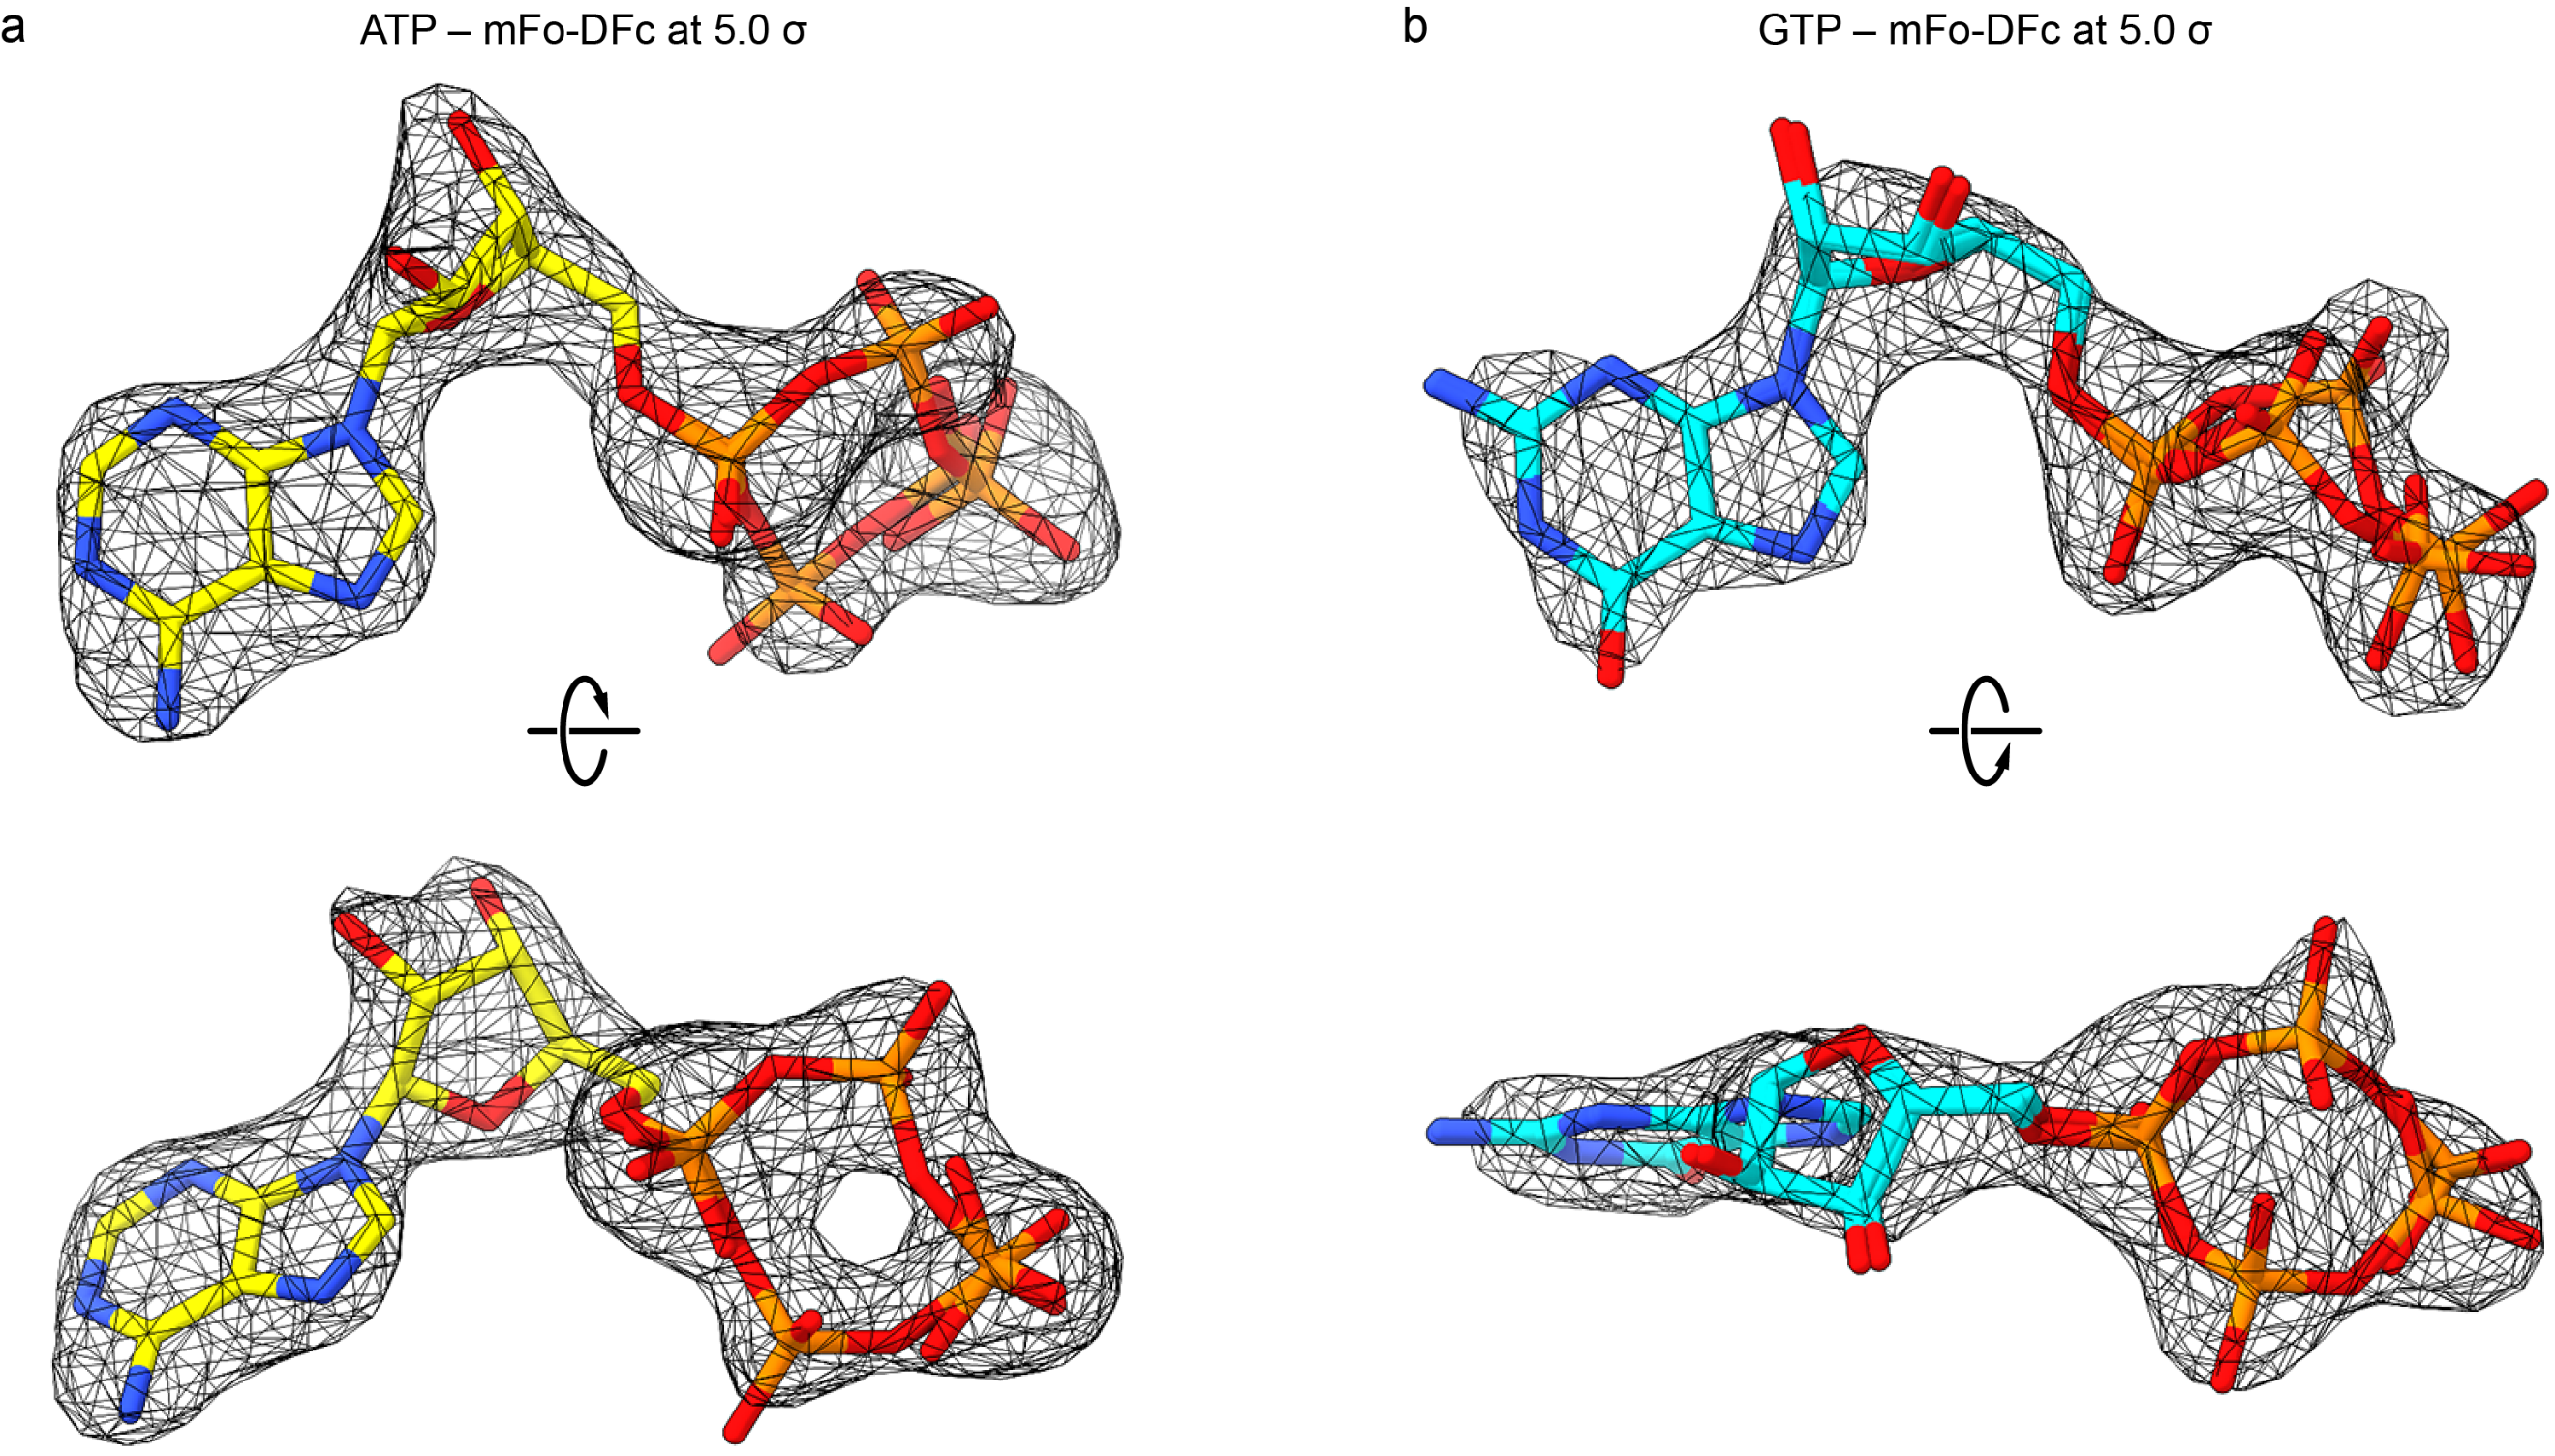


Supplementary Fig. 6 | Electron density maps for ATP and GTP.

Electron density maps for a ATP (PDB ID: 9HG2, chain A) and b GTP (PDB ID: 9HG3, chain A) bound in their respective binding sites. The mFo–DFc maps are contoured at 5.0 σ within a 2.0-Å radius around each ligand atom. Ligands were omitted during map calculations. Both alternative ligand conformations are shown.


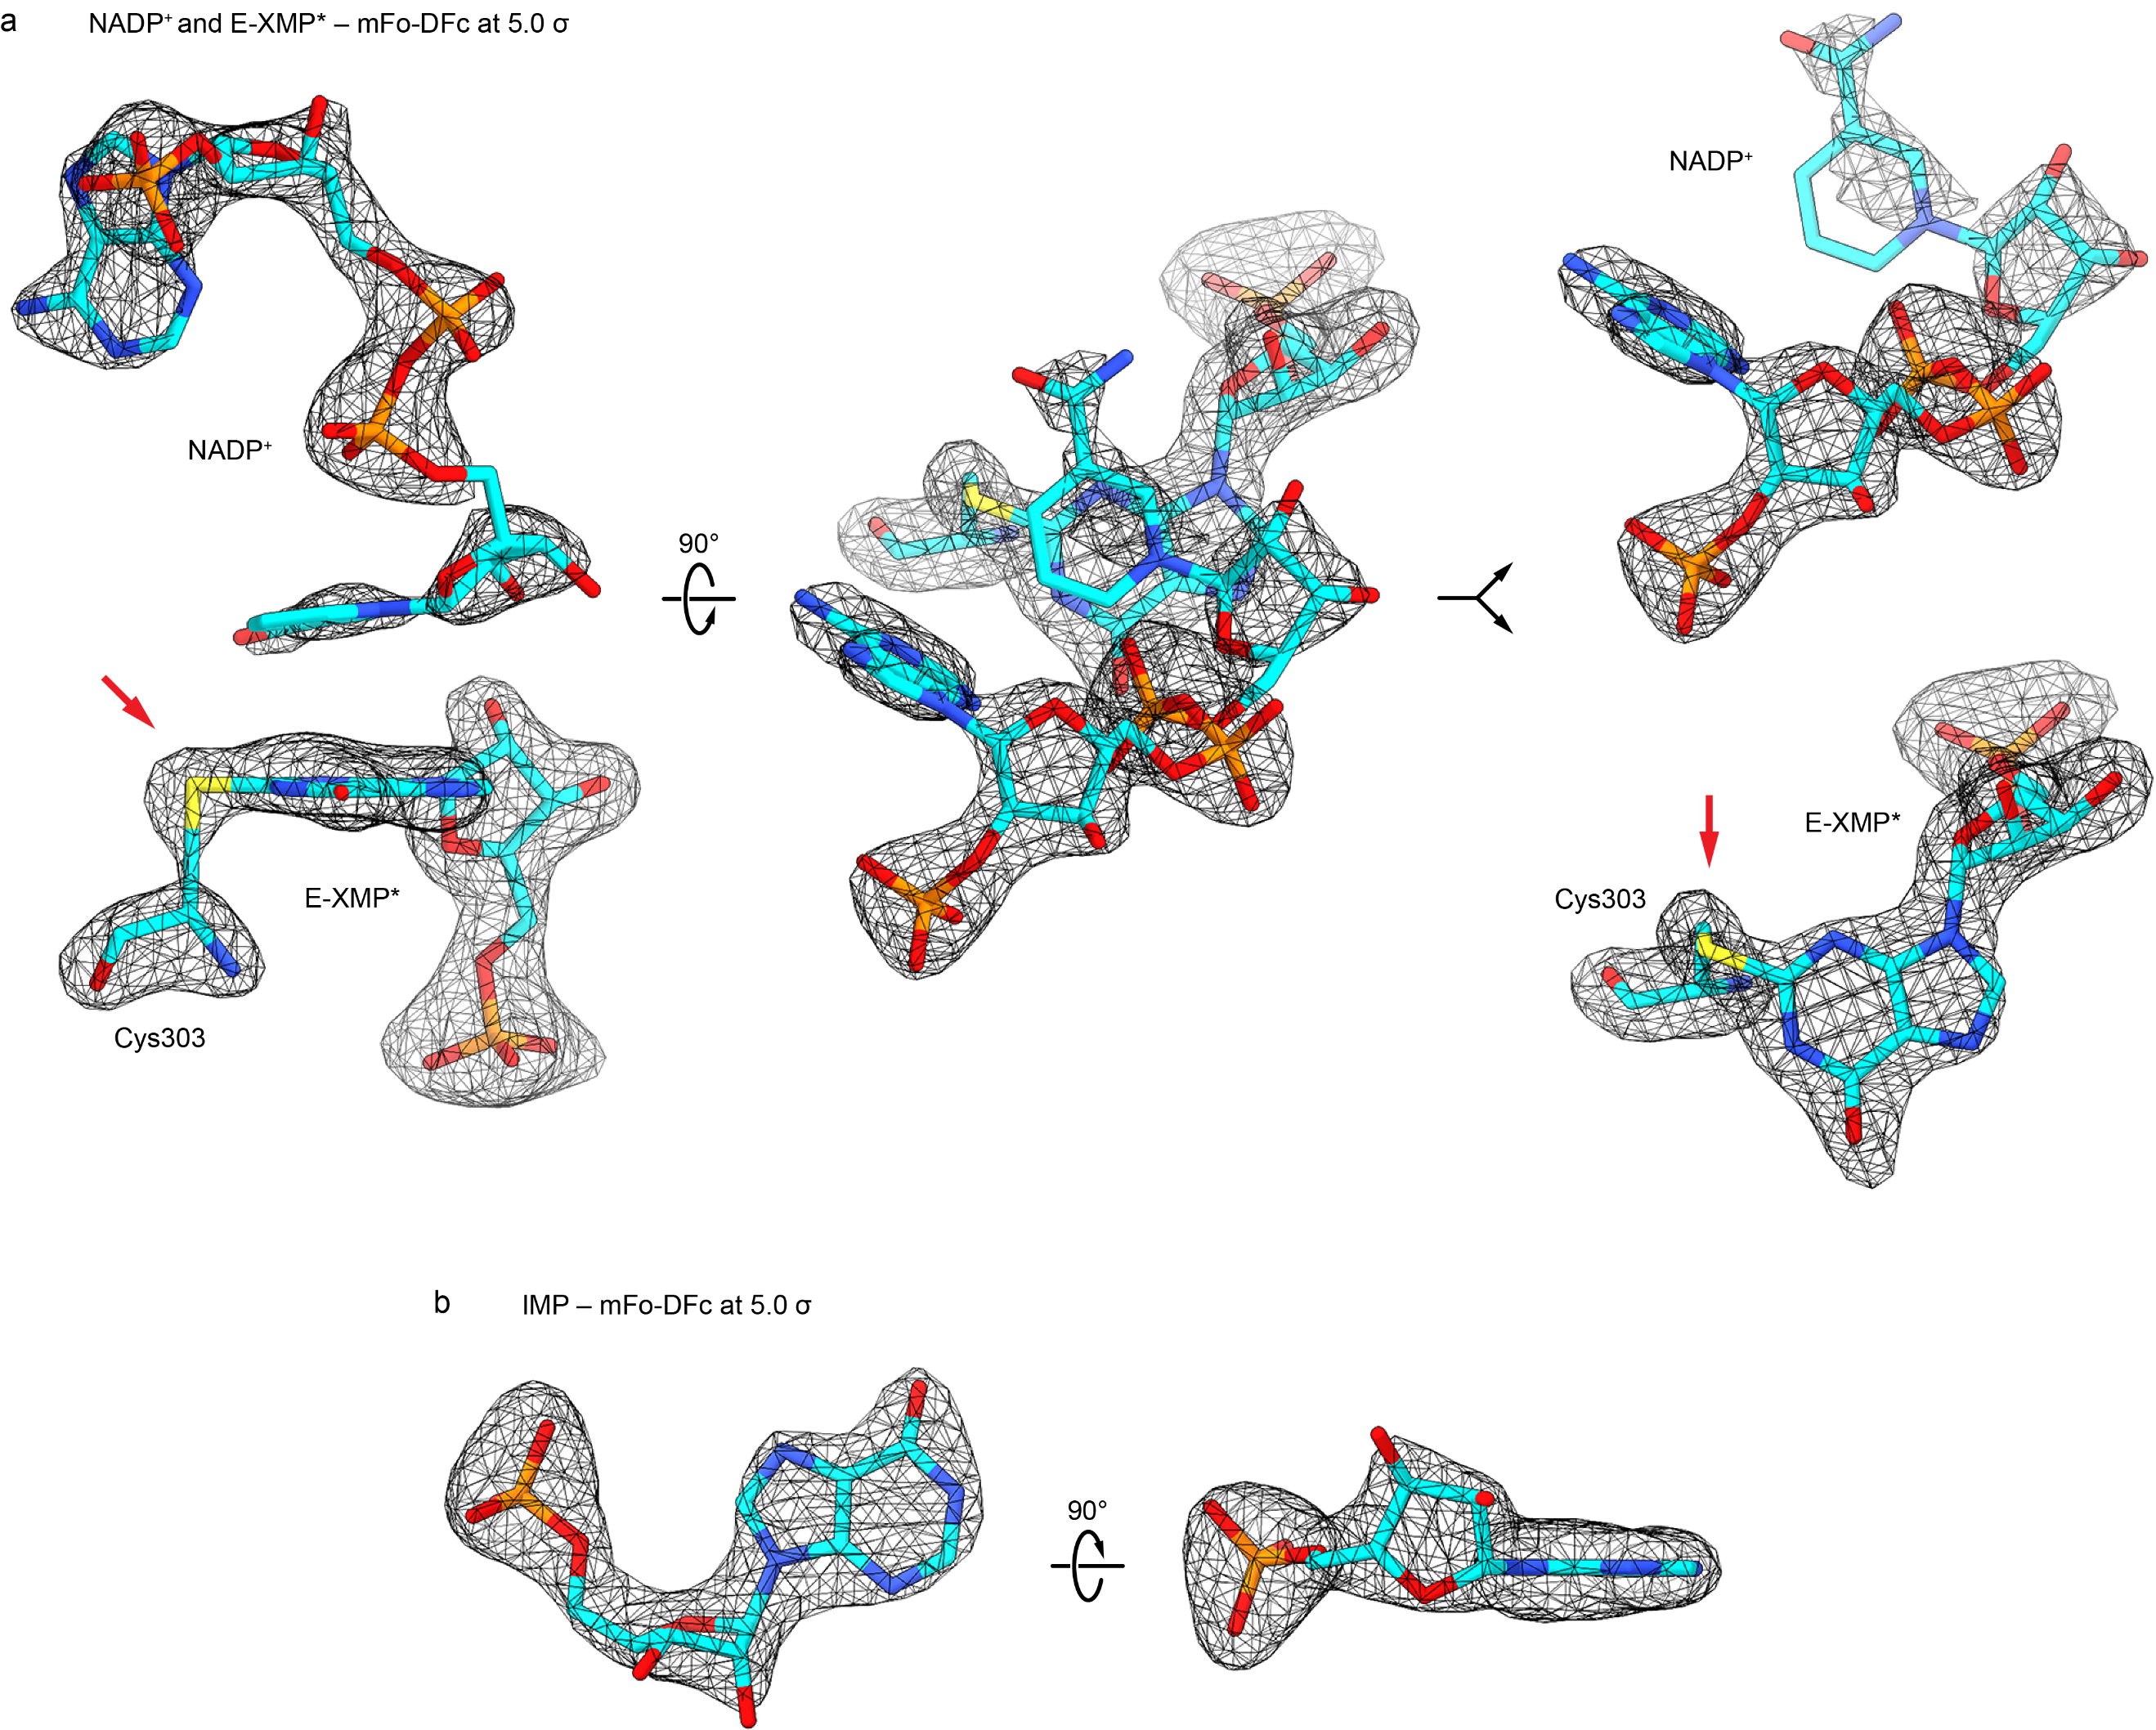


Supplementary Fig. 7 | Electron density maps for NADP+, E-XMP*, and IMP.

a Electron density map for NADP+ and the E-XMP* intermediate bound in the active site (PDB ID: 9HG0, chain A). Red arrows indicate the covalent linkage of the E-XMP* intermediate to Cys303. For clarity, the ligands are also shown separately in the leftmost panel. b Electron density map for IMP bound in the ligand-binding site G (PDB ID: 9HG0, chain A). The mFo–DFc maps are contoured at 5.0 σ within a 2.0-Å radius around each ligand atom. Ligands were omitted during map calculations.


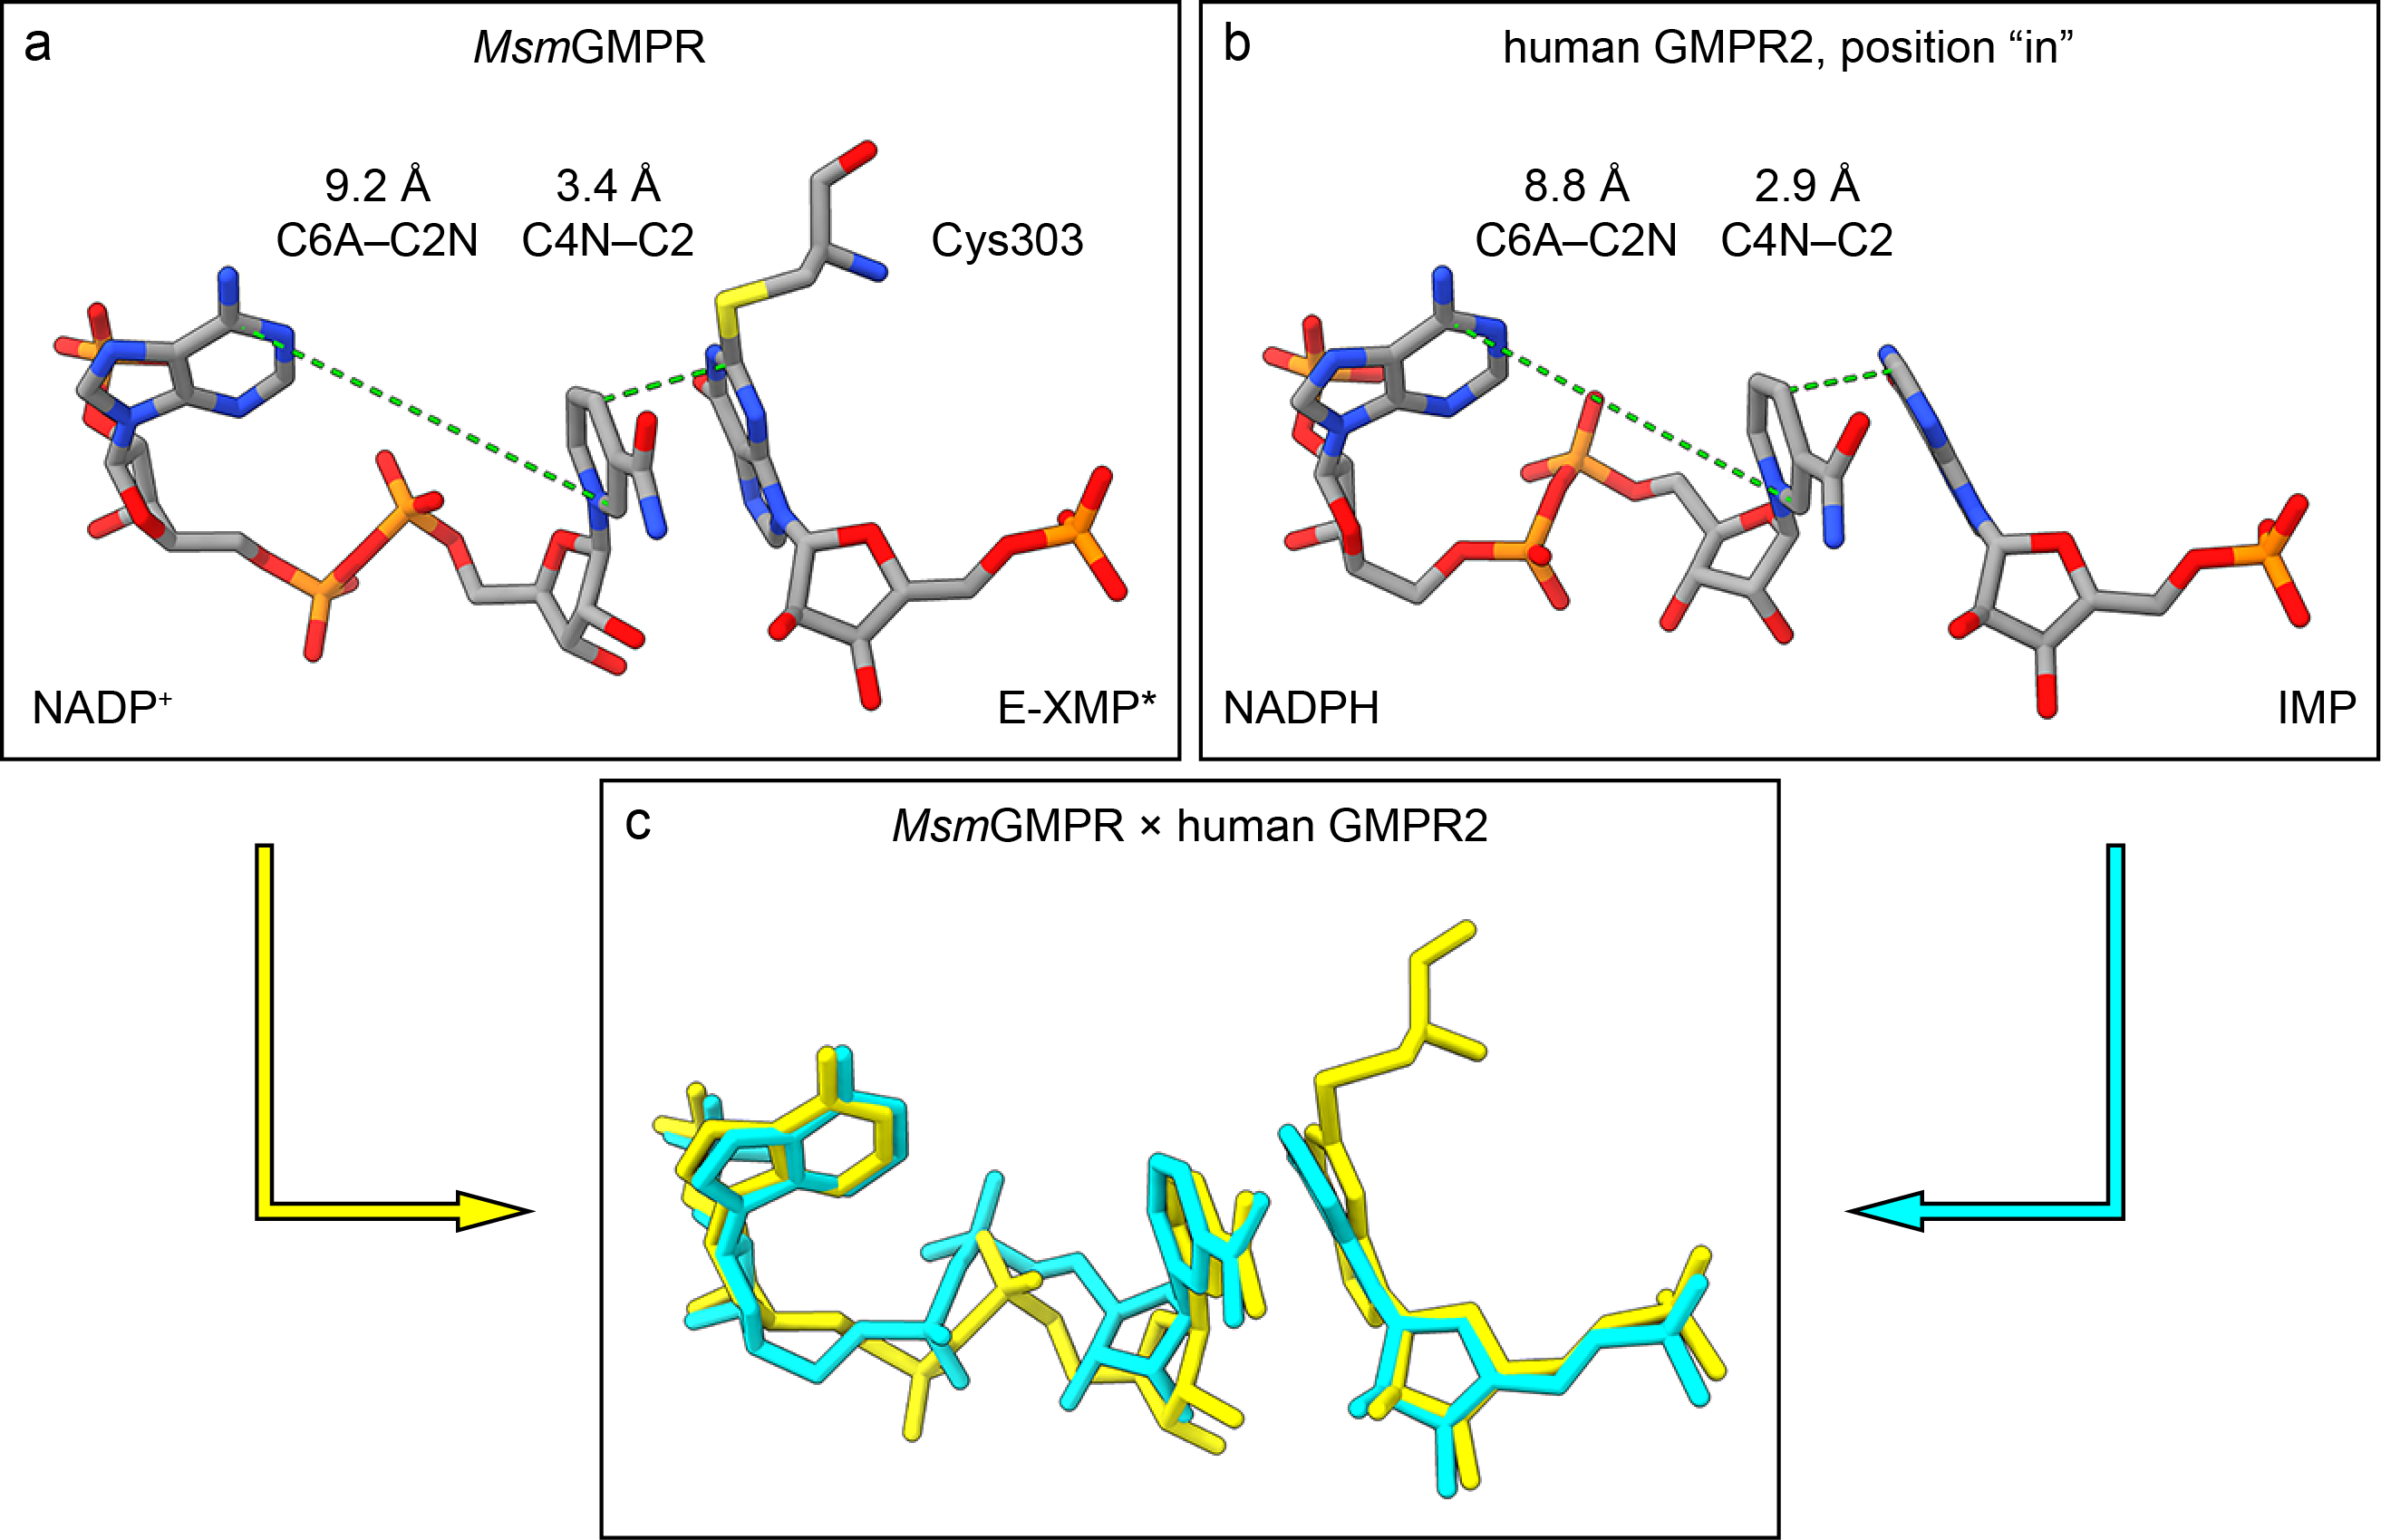


Supplementary Fig. 8 | Comparison of NADP+ and NADPH conformations in *Msm*GMPR and human GMPR2.

a NADP+ and the E-XMP* intermediate bound in *Msm*GMPR (PDB ID: 9HG0, chain A). The distance between NADP+ atoms C6Aand C2N is 9.2 ± 0.1 Å, and the distance between NADP+ atom C4N and E-XMP* atom C2 is 3.4 ± 0.0 Å. b NADPH in the “in” position and IMP bound in human GMPR23 (PDB ID: 2C6Q, chain B). The distance between NADPH atoms C6Aand C2N is 8.8 ± 0.1 Å, and the distance between NADPH atom C4N and IMP atom C2 is 2.9 ± 0.0 Å. c Ligands were aligned using the LS-align tool4. Distances are calculated as averages across all suitable chains in the structures.


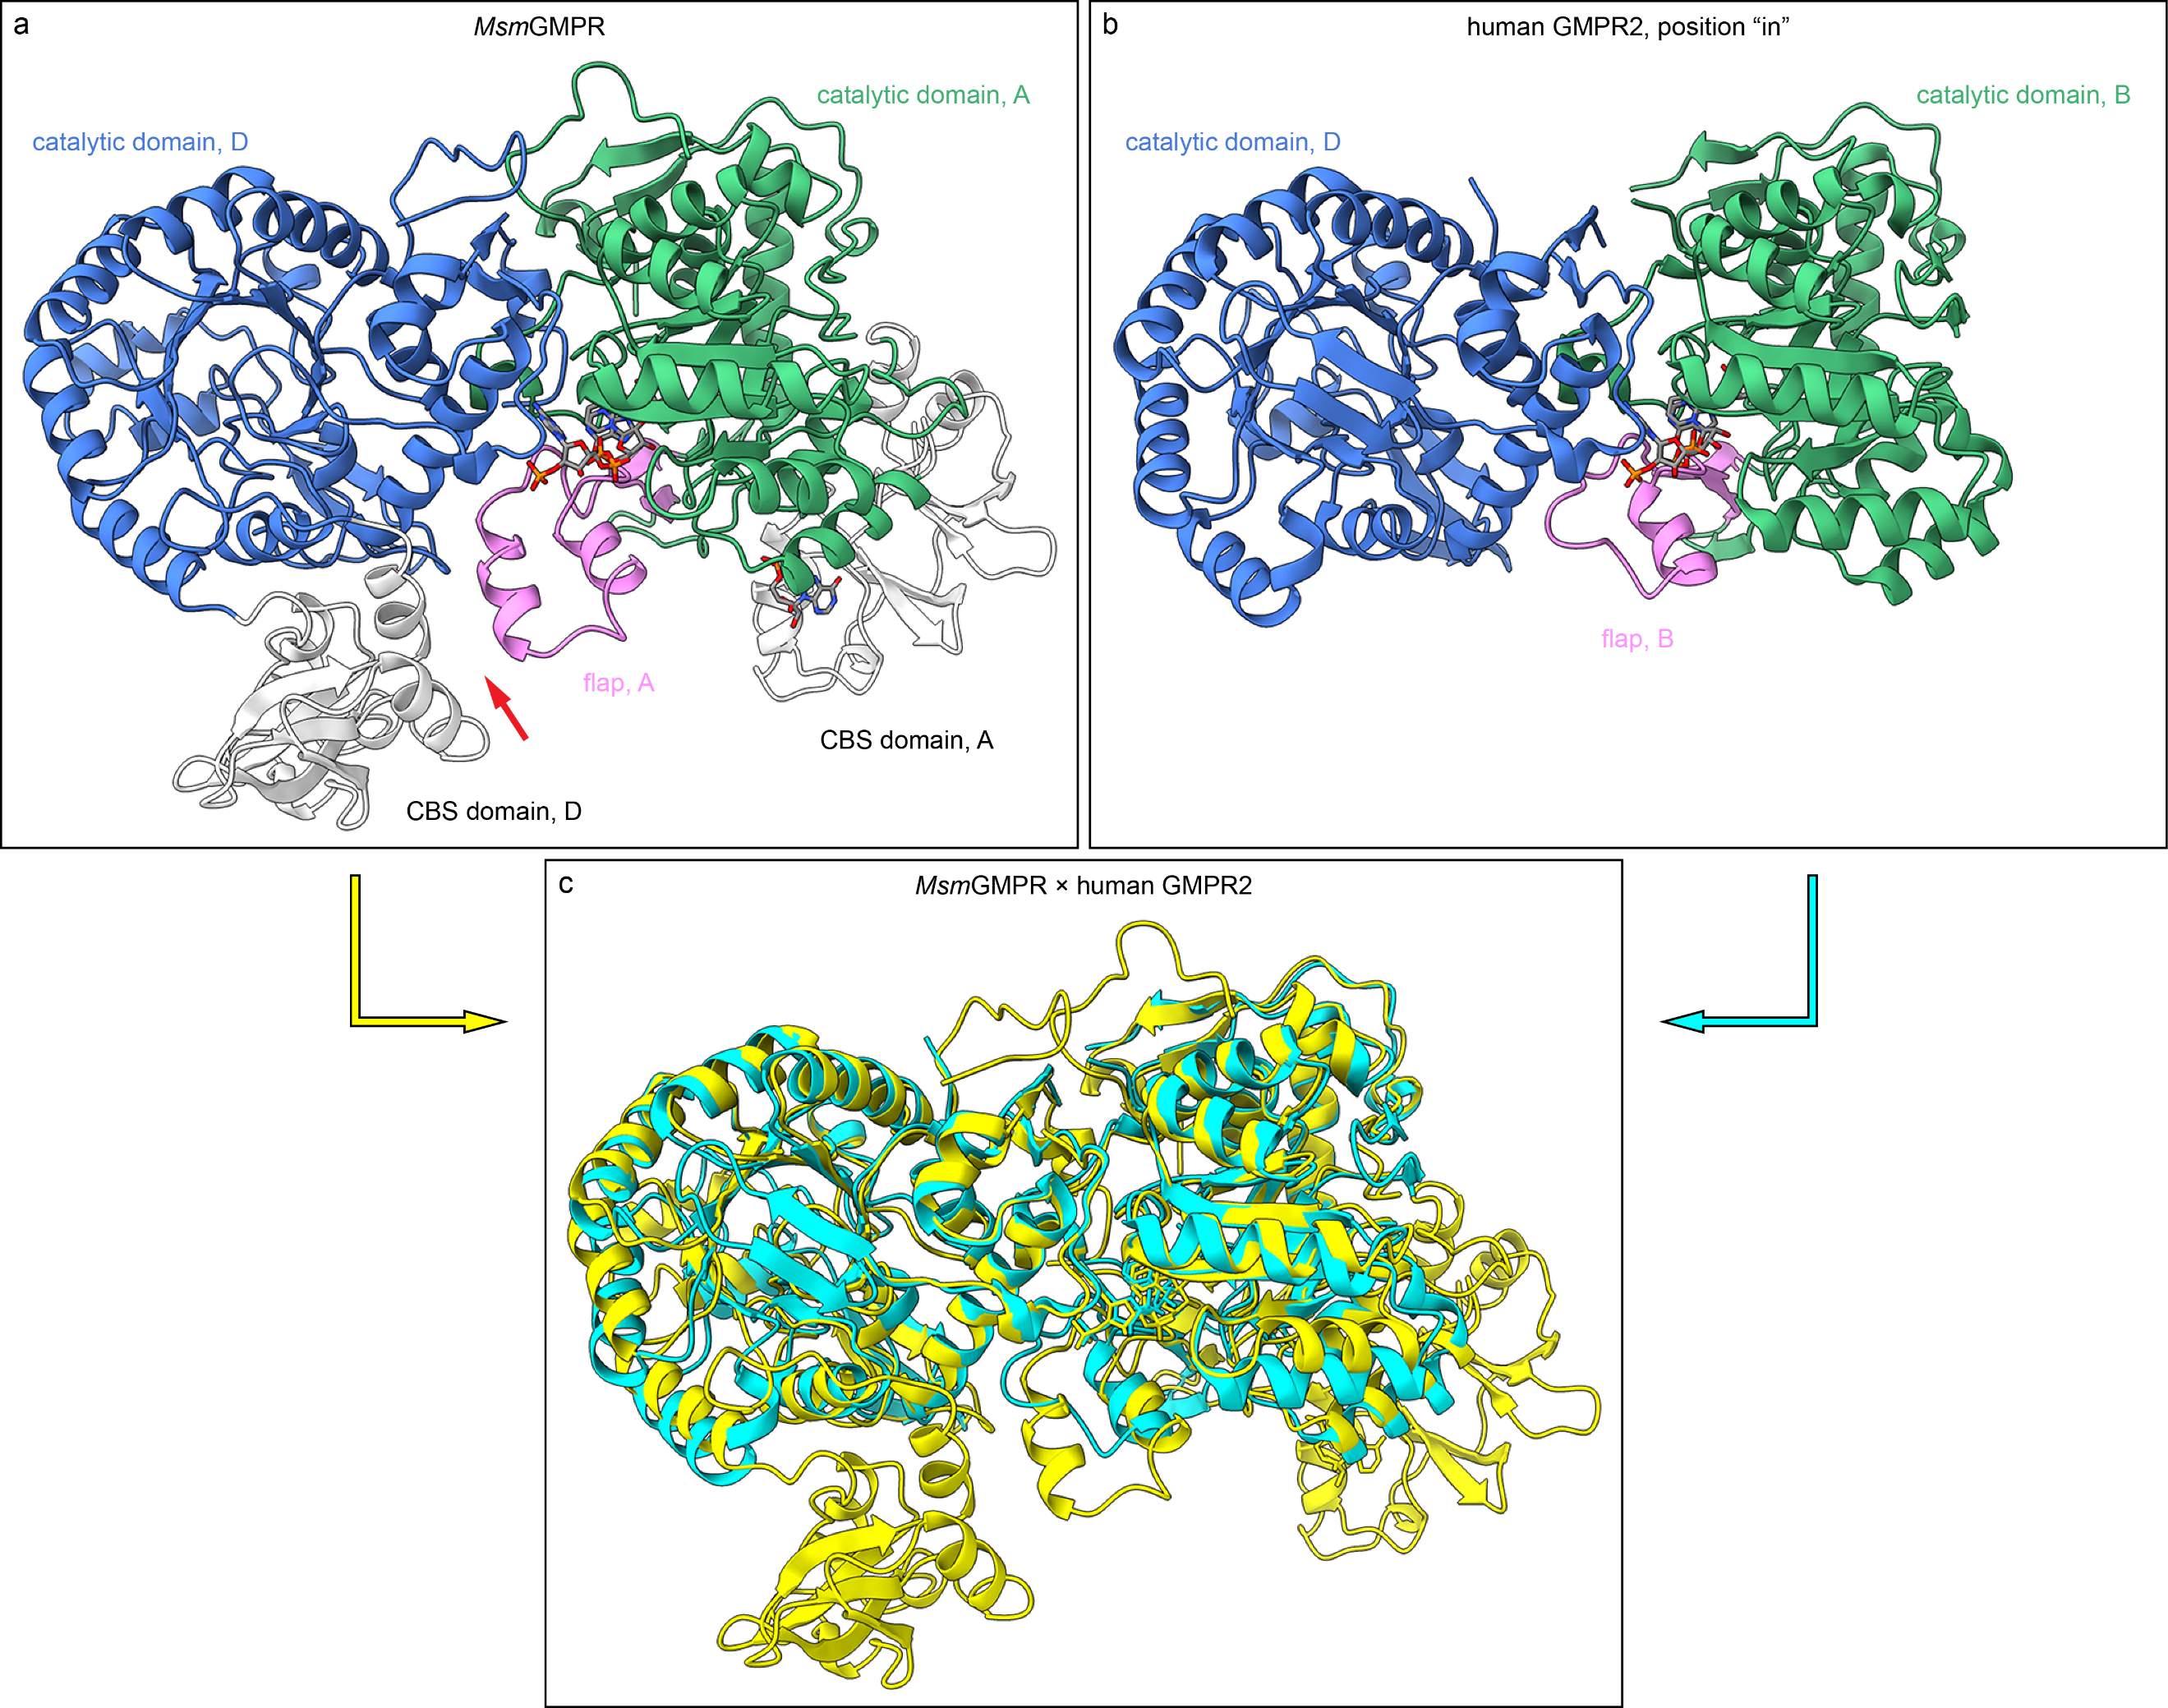


Supplementary Fig. 9 | Comparison of flap conformations in *Msm*GMPR and human GMPR2.

a *Msm*GMPR with NADP+ and the E-XMP* intermediate in the active site (PDB ID: 9HG0, chain A). b Human GMPR2 with NADPH in the “in” position and IMP in the active site3 (PDB ID: 2C6Q, chain B). The main monomer is shown in green, the adjacent monomer in blue, and the CBS domains in white. Flap regions are shown in magenta (*Msm*GMPR – residues 381–420, human GMPR2 – residues 261–296). The flap in *Msm*GMPR contains an additional helix, stabilized by the interaction with the CBS domain from the adjacent monomer (red arrow). c Structural overlay. *Msm*GMPR is shown in yellow, and human GMPR2 in cyan. The structures were aligned over chains A and D from *Msm*GMPR.


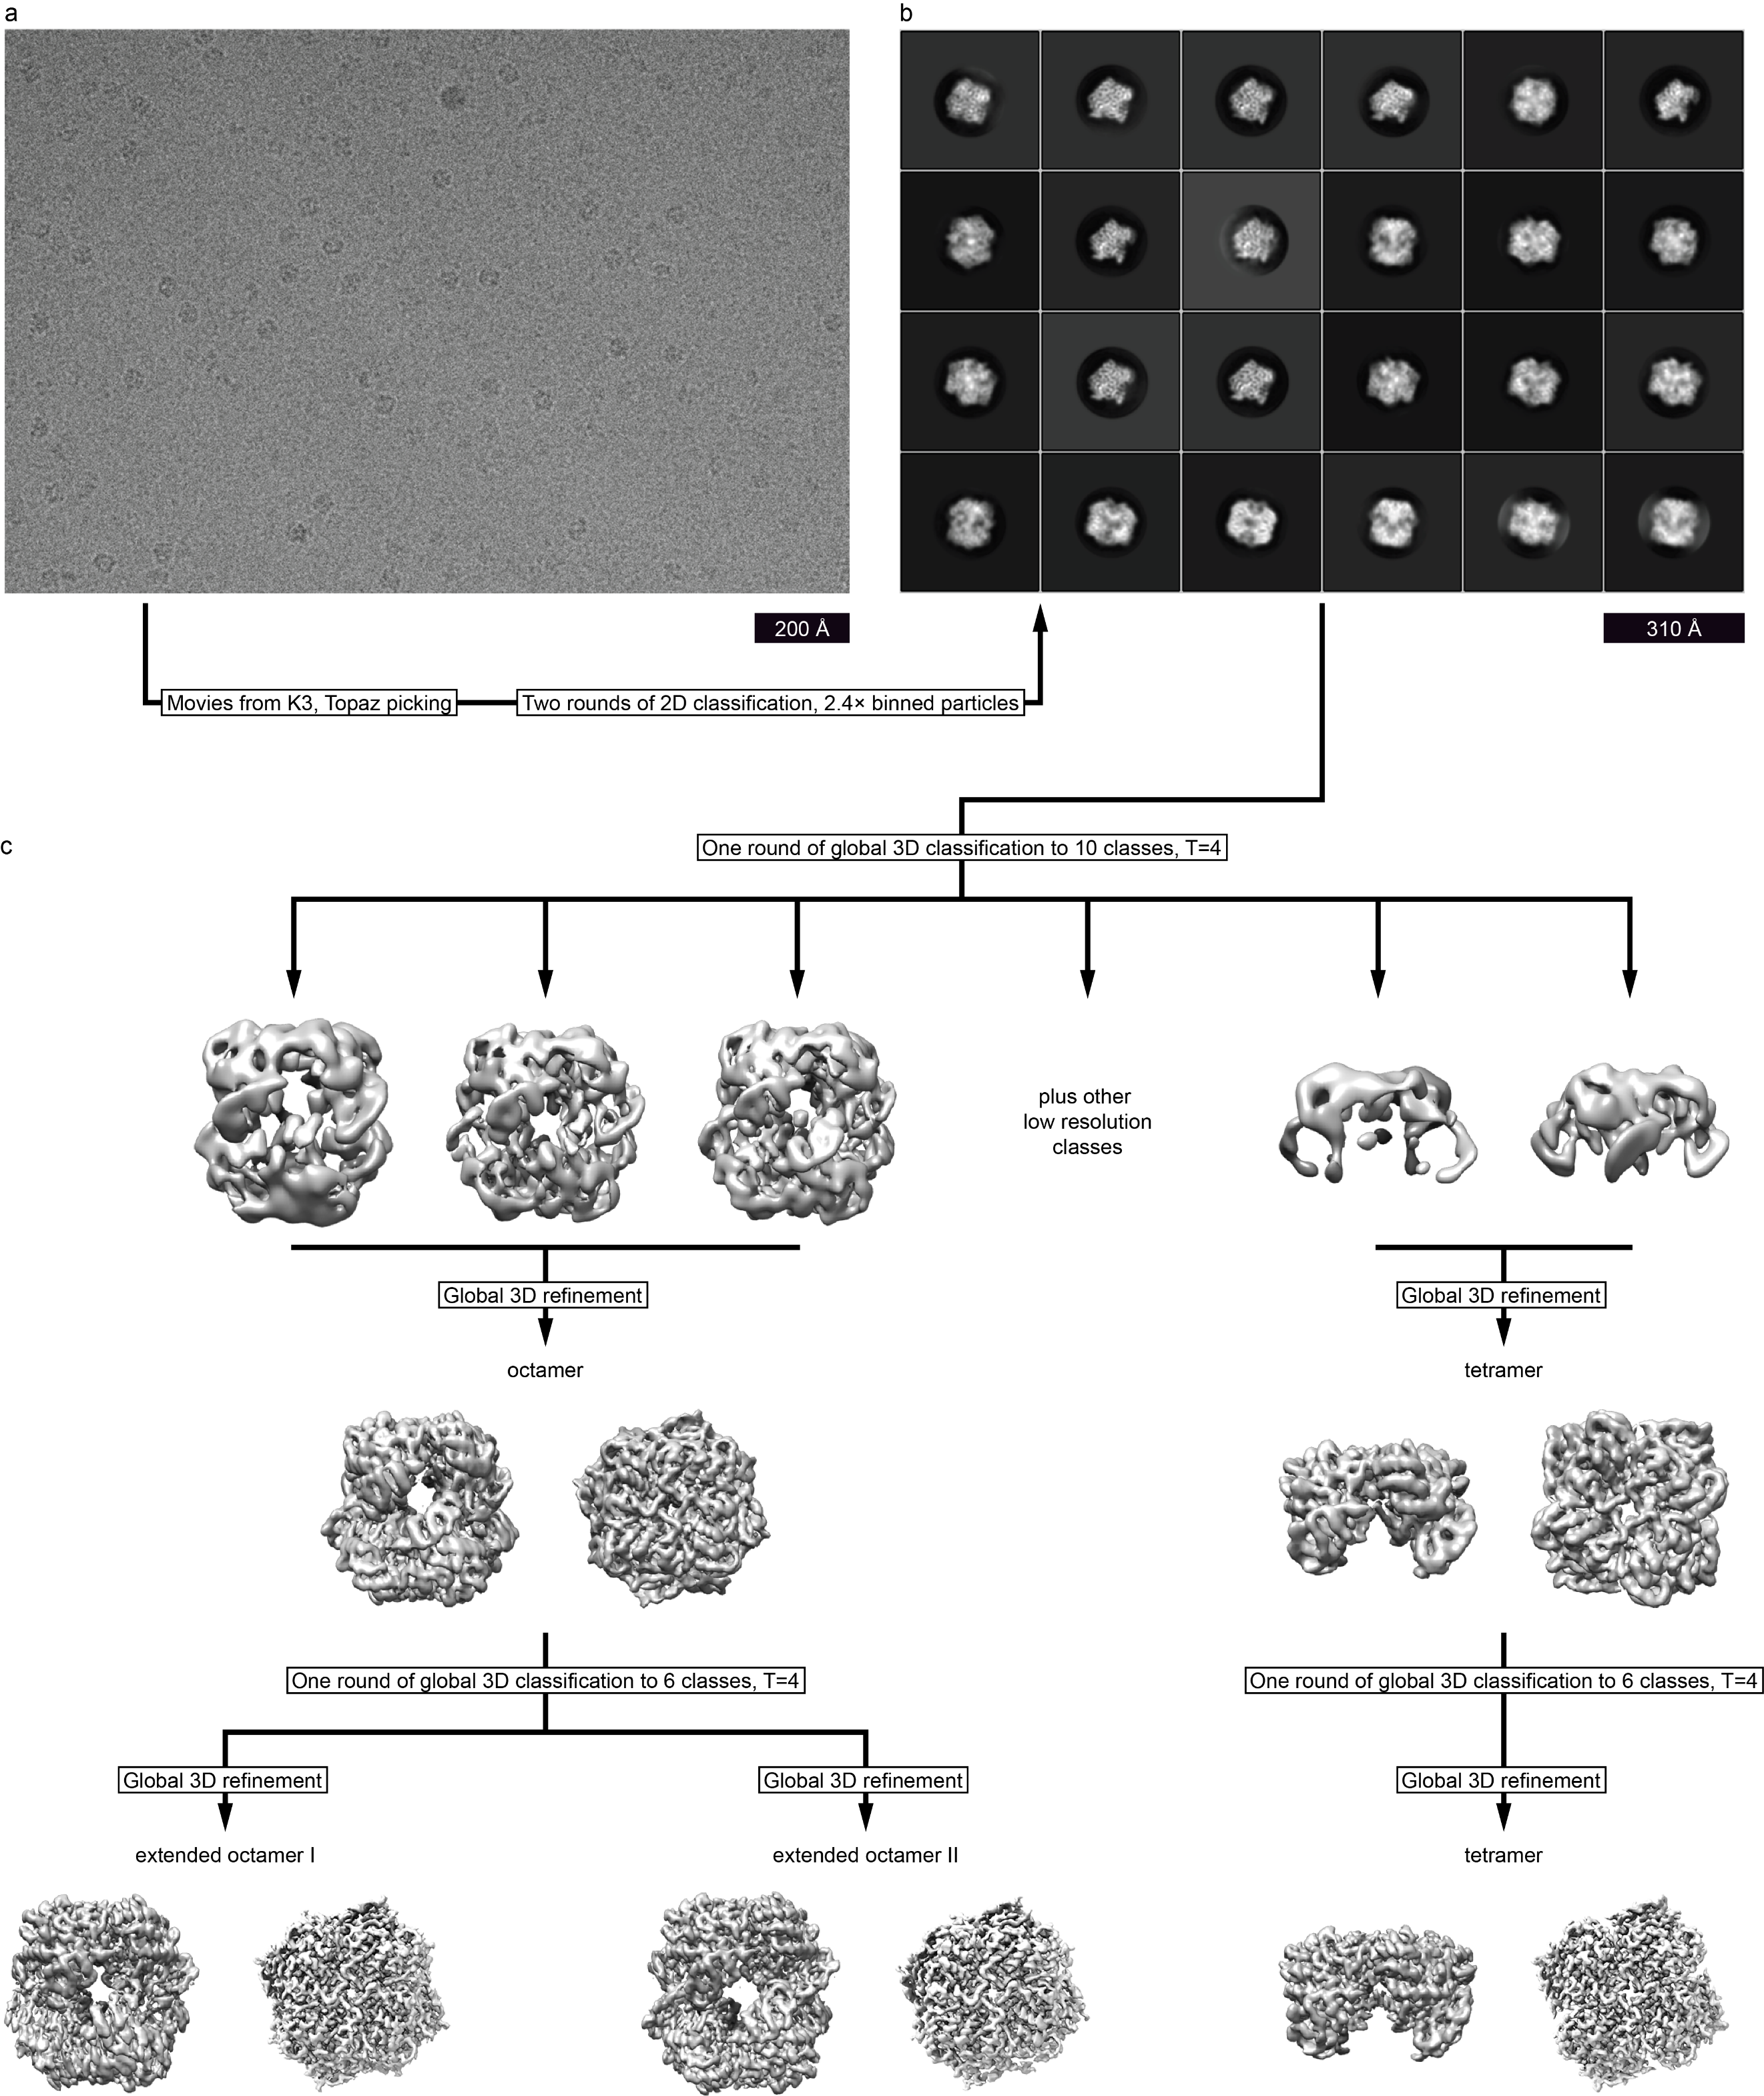


Supplementary Fig. 10 | Particle classification and map refinement scheme for an *Msm*GMPR apoform sample at pH 7.8.

a Micrograph of *Msm*GMPR particles in free-standing ice after MotionCor25 correction, collected at a defocus of ~2.5 µm. b Representative 2D-classification averages. c Global 3D-classification and refinement scheme. Final cryo-EM maps were refined and post-processed using appropriate masks in RELION 4.06 and filtered with LocScale7.


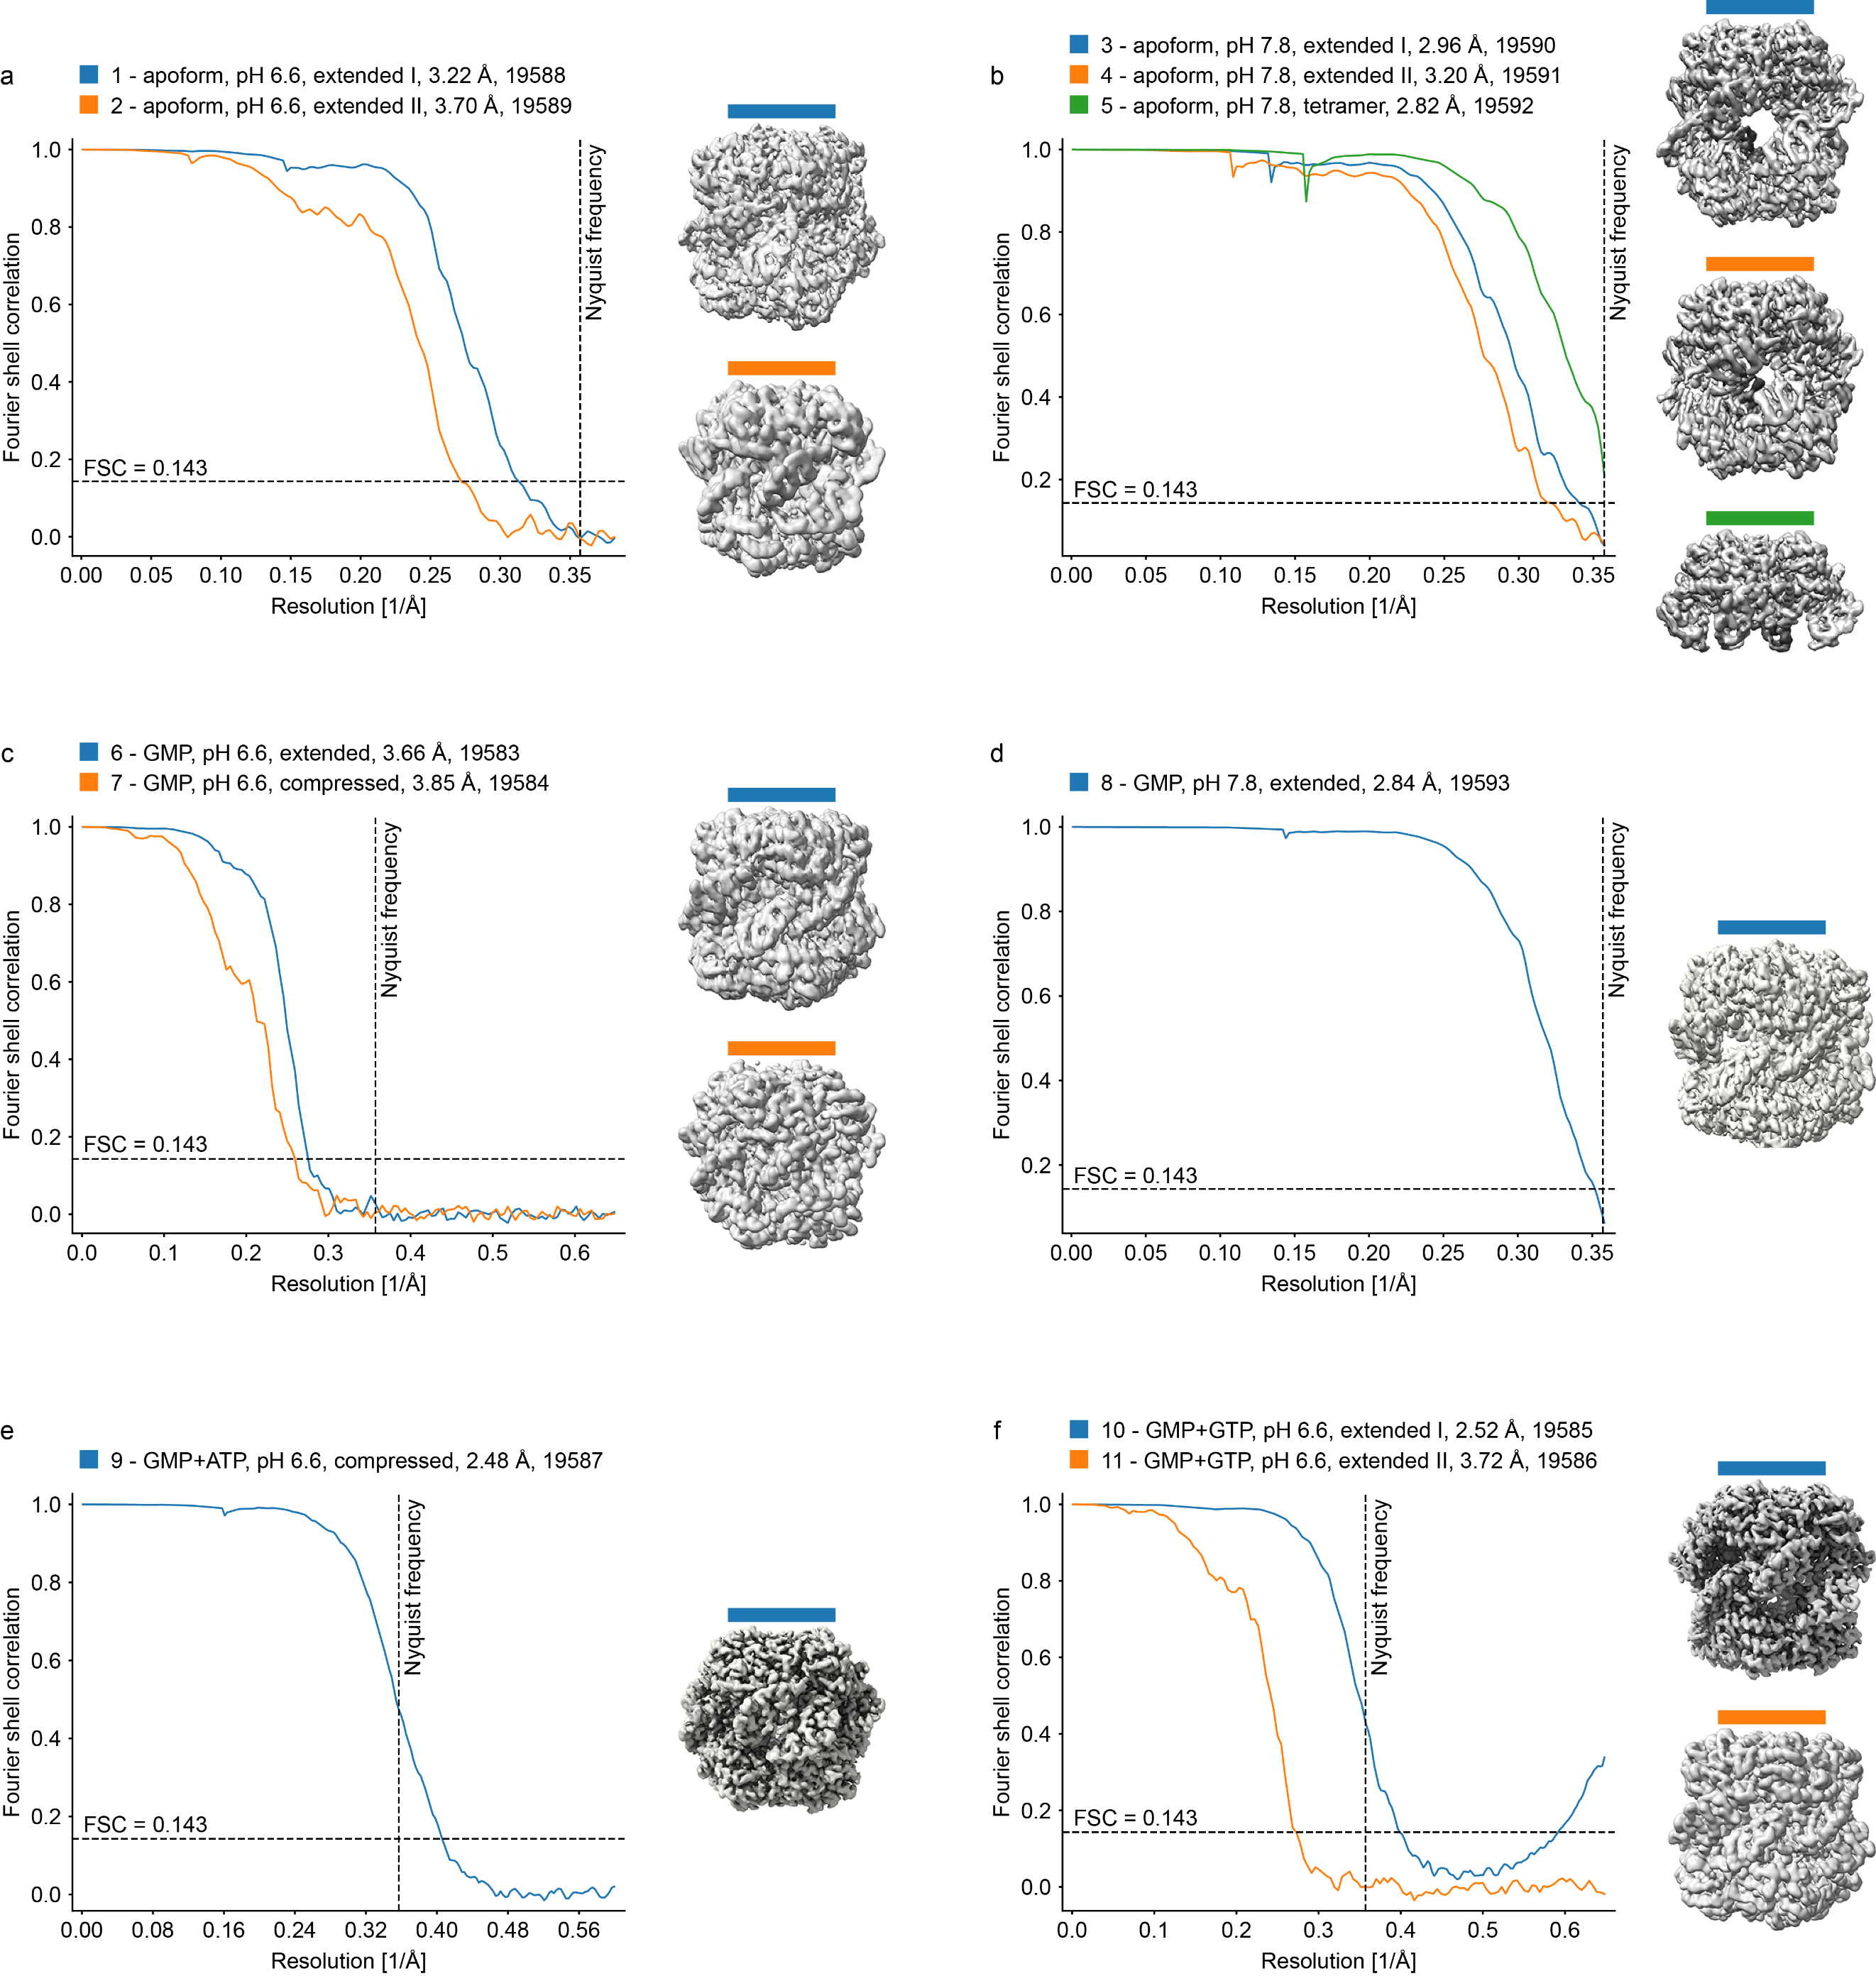


Supplementary Fig. 11 | Final cryo-EM maps and Fourier shell correlation curves.

a *Msm*GMPR apoform at pH 6.6. b *Msm*GMPR apoform at pH 7.8. c *Msm*GMPR in complex with GMP at pH 6.6. d *Msm*GMPR in complex with GMP at pH 7.8. e *Msm*GMPR in complex with GMP and ATP at pH 6.6. f *Msm*GMPR in complex with GMP and GTP at pH 6.6. The Fourier shell correlation (FSC) curves represent the correlation between two independently refined half-maps, indicating the overall resolution of both half-maps. The horizontal dashed line marks the FSC threshold of 0.143. The vertical dashed line indicates the Nyquist frequency of extracted particles at 2.8 Å. The numbering of the curves and maps corresponds to Supplementary Table 5. The legend also specifies the bound ligands present in the model, the sample pH, the conformation of the fitted model, the map resolution, and the EMDB ID of each deposited map.

**Supplementary Tables**

Supplementary Table 1 | Analyzed structures of *Msm*GMPR

1. Difference in rotation around the protein’s four-fold axis, see Fig. 3.
2. Difference in the distance between the two tetramers, see Fig. 3.
3. Knejzlík et al. 20228.
4. This structure has two octamers in the asymmetric unit. In Fig. 3, octamer 2 is marked with an apostrophe.

Supplementary Table 2 | Crystallization conditions

Supplementary Table 3 | X-ray crystallography data collection, refinement, and validation statistics

Supplementary Table 4 | Analyzed cryo-EM samples

Supplementary Table 5 | Cryo-EM data collection, refinement, and validation statistics.

**Supplementary references**

1. Buey RM*, et al.* Guanine nucleotide binding to the Bateman domain mediates the allosteric inhibition of eukaryotic IMP dehydrogenases. *Nat Commun* **6**, 8923 (2015).

2. Buey RM*, et al.* A nucleotide-controlled conformational switch modulates the activity of eukaryotic IMP dehydrogenases. *Sci Rep* **7**, 2648 (2017).

3. Patton GC*, et al.* Cofactor mobility determines reaction outcome in the IMPDH and GMPR (beta-alpha)8 barrel enzymes. *Nat Chem Biol* **7**, 950-958 (2011).

4. Hu J, Liu Z, Yu DJ, Zhang Y. LS-align: an atom-level, flexible ligand structural alignment algorithm for high-throughput virtual screening. *Bioinformatics* **34**, 2209-2218 (2018).

5. Zheng SQ, Palovcak E, Armache JP, Verba KA, Cheng Y, Agard DA. MotionCor2: anisotropic correction of beam-induced motion for improved cryo-electron microscopy. *Nat Methods* **14**, 331-332 (2017).

6. Kimanius D, Dong L, Sharov G, Nakane T, Scheres SHW. New tools for automated cryo-EM single-particle analysis in RELION-4.0. *Biochem J* **478**, 4169-4185 (2021).

7. Jakobi AJ, Wilmanns M, Sachse C. Model-based local density sharpening of cryo-EM maps. *Elife* **6**, (2017).

8. Knejzlik Z*, et al.* The mycobacterial guaB1 gene encodes a guanosine 5'-monophosphate reductase with a cystathionine-beta-synthase domain. *FEBS J* **289**, 5571-5598 (2022).
